# Supplementary material for: Molecular Abnormalities in BTBR Mice and Their Relevance to Schizophrenia and Autism Spectrum Disorders: An Overview of Transcriptomic and Proteomic Studies
Source: MDPI journal article supplement (doi:10.3390/biomedicines11020289), 2023-01-20
Supplement: s1 [file s1]

## Supplementary Tables

| Tab   | Title                   | Caption                                                                        |
|-------|-------------------------|--------------------------------------------------------------------------------|
| Tab 1 | Supplementary Table S1a | The list of most reproducible DE genes in the hippocampus of BTBR mice         |
| Tab 2 | Supplementary Table S1b | The list of most reproducible DE genes in the cortex and striatum of BTBR mice |
| Tab 3 | Supplementary Table S3a | Gene set enrichment analysis of all expressed genes in the hippocampus         |
| Tab 4 | Supplementary Table S2b | Gene set enrichment analysis of all expressed genes in the striatum            |
| Tab 5 | Supplementary Table S3  | The list of "high prediction score" mutations                                  |
| Tab 6 | Supplementary Table S4a | The list of SZH related genes                                                  |
| Tab 7 | Supplementary Table S4b | The list of ASD related genes                                                  |

**Supplement Table S1a.** The list of most reproducible DE genes in the hippocampus of BTBR mice

| GeneSymbol    | Up/down | Number of datasets |
|---------------|---------|--------------------|
| Blvrb         | up      | 3                  |
| Scg5          | up      | 3                  |
| Serpina3n     | up      | 3                  |
| Anxa5         | up      | 3                  |
| Snape3        | up      | 2                  |
| Clec16a       | up      | 2                  |
| Kras          | up      | 2                  |
| Nude          | up      | 2                  |
| Cap1          | up      | 2                  |
| Uba5          | up      | 2                  |
| Adi1          | up      | 2                  |
| Mrpl3         | up      | 2                  |
| Slc7a14       | up      | 2                  |
| Wfs1          | up      | 2                  |
| Gins4         | up      | 2                  |
| Lpl           | up      | 2                  |
| Extl1         | up      | 2                  |
| Plcxd2        | up      | 2                  |
| Tbc1d9b       | up      | 2                  |
| Mamdc2        | up      | 2                  |
| Abhd1         | up      | 2                  |
| Pla2g4e       | up      | 2                  |
| Gbp2b         | up      | 2                  |
| Kcnh5         | up      | 2                  |
| Mpzl2         | up      | 2                  |
| Gon4l         | up      | 2                  |
| Wdfy1         | up      | 2                  |
| Scly          | up      | 2                  |
| Syt11         | up      | 2                  |
| Mroh7         | up      | 2                  |
| Exd1          | up      | 2                  |
| Cdhr1         | up      | 2                  |
| Sfrp1         | up      | 2                  |
| Acer2         | up      | 2                  |
| Amica1        | up      | 2                  |
| Cfap46        | up      | 2                  |
| Gabra2        | up      | 2                  |
| Folh1         | up      | 2                  |
| Hddec3        | up      | 2                  |
| Necab3        | up      | 2                  |
| C330024D21Rik |         |                    |
| k             | up      | 2                  |
| Filip1        | up      | 2                  |
| Slc15a2       | up      | 2                  |
| 2610005L07Rik | up      | 2                  |
| Amy1          | up      | 2                  |
| Clcn6         | up      | 2                  |

|              |      |   |
|--------------|------|---|
| Me3          | up   | 2 |
| Padi2        | up   | 2 |
| Fv1          | up   | 2 |
| Lrrc27       | up   | 2 |
| Shd          | up   | 2 |
| Ahdc1        | up   | 2 |
| Zfp612       | up   | 2 |
| Ndn          | up   | 2 |
| Faim2        | up   | 2 |
| Wbp11        | up   | 2 |
| C1qb         | down | 3 |
| Spink8       | down | 3 |
| Entpd4       | down | 3 |
| Pop4         | down | 3 |
| Alg1         | down | 3 |
| Rpl29        | down | 3 |
| Ccnd1        | down | 3 |
| Mt3          | down | 3 |
| Zfp131       | down | 3 |
| 6330403K07Ri |      |   |
| k            | down | 3 |
| Nudt19       | down | 3 |
| C1ql2        | down | 3 |
| Evc2         | down | 3 |
| Cetn4        | down | 3 |
| 1700025G04Ri |      |   |
| k            | down | 2 |
| Sv2b         | down | 2 |
| Ttc17        | down | 2 |
| Caskin1      | down | 2 |
| Hsp90b1      | down | 2 |
| Rgl1         | down | 2 |
| Armc8        | down | 2 |
| Clcn7        | down | 2 |
| Enpp5        | down | 2 |
| Stk25        | down | 2 |
| Kcnf1        | down | 2 |
| Dusp7        | down | 2 |
| Rapgef11     | down | 2 |
| Hsd11b1      | down | 2 |
| Sema5a       | down | 2 |
| Crym         | down | 2 |
| Gnptab       | down | 2 |
| Hdhd2        | down | 2 |
| Cort         | down | 2 |
| Igsf3        | down | 2 |
| Slc25a3      | down | 2 |
| Ddhd1        | down | 2 |
| Zmynd11      | down | 2 |
| Bdnf         | down | 2 |
| Anxa3        | down | 2 |

|               |      |   |
|---------------|------|---|
| Ppm1m         | down | 2 |
| Lym7          | down | 2 |
| A830018L16Rik |      |   |
| k             | down | 2 |
| Dbnidd2       | down | 2 |
| Bpnt1         | down | 2 |
| Grhl1         | down | 2 |
| 9330151L19Rik | down | 2 |
| Tnni1         | down | 2 |
| Pgap2         | down | 2 |
| Ankrd33b      | down | 2 |
| Trpc6         | down | 2 |
| Myo7a         | down | 2 |
| Il1r1         | down | 2 |
| Myo5b         | down | 2 |
| Id4           | down | 2 |
| Zfp846        | down | 2 |
| Trim12a       | down | 2 |
| Stpg1         | down | 2 |
| Thbs4         | down | 2 |
| Rpl14         | down | 2 |
| 4930503L19Rik | down | 2 |
| Tmem260       | down | 2 |
| Vmn2r29       | down | 2 |
| C5ar2         | down | 2 |
| Irgm2         | down | 2 |
| Tmem254a      | down | 2 |
| Prr18         | down | 2 |
| Arhgap15      | down | 2 |
| Exosc9        | down | 2 |
| Npy2r         | down | 2 |
| Lct           | down | 2 |
| Zfp433        | down | 2 |
| Trim34a       | down | 2 |
| Snape1        | down | 2 |
| Ptgs2         | down | 2 |
| Hpgd          | down | 2 |
| Cml5          | down | 2 |
| Rec8          | down | 2 |
| Naaa          | down | 2 |
| Cisd2         | down | 2 |
| 2900052N01Rik |      |   |
| k             | down | 2 |
| 2610044O15Rik |      |   |
| k8            | down | 2 |
| Ctss          | down | 2 |
| Slc35a5       | down | 2 |
| Crispld1      | down | 2 |
| Rps4l         | down | 2 |

|               |      |   |
|---------------|------|---|
| Krt12         | down | 2 |
| Gstm6         | down | 2 |
| Ccbe1         | down | 2 |
| Eif3j1        | down | 2 |
| Kctd4         | down | 2 |
| Frzb          | down | 2 |
| Thsd4         | down | 2 |
| Gvin1         | down | 2 |
| Emp2          | down | 2 |
| Inmt          | down | 2 |
| Alox8         | down | 2 |
| Gm7120        | down | 2 |
| Gabra5        | down | 2 |
| Phyh          | down | 2 |
| Pttg1         | down | 2 |
| Itpka         | down | 2 |
| 4833420G17Rik | down | 2 |
| Ifi203        | down | 2 |
| Zfp236        | down | 2 |
| Rint1         | down | 2 |
| Frrs11        | down | 2 |
| Slc37a2       | down | 2 |
| Mettl10       | down | 2 |
| Myoc          | down | 2 |
| Trim30d       | down | 2 |
| Alox12b       | down | 2 |
| Gatm          | down | 2 |
| Eps8l1        | down | 2 |
| Hjurp         | down | 2 |
| Acpl          | down | 2 |
| Tmem159       | down | 2 |
| Defb11        | down | 2 |
| Zfp781        | down | 2 |
| Nxpe4         | down | 2 |
| Pde6h         | down | 2 |
| Mobp          | down | 2 |
| Trf           | down | 2 |
| Psenen        | down | 2 |
| Capns1        | down | 2 |
| Cx3cr1        | down | 2 |
| Scoc          | down | 2 |
| Bex4          | down | 2 |
| Pon2          | down | 2 |
| Psmb5         | down | 2 |
| Rnps1         | down | 2 |
| Pfdn5         | down | 2 |
| Sepw1         | down | 2 |
| C1qc          | down | 2 |
| B2m           | down | 2 |
| Il33          | down | 2 |

**Supplement Table S1b.** The list of most reproducible DE genes in the cortex and striatum of BTBR mic

| GeneSymbol   | Up/down | Number of datasets |
|--------------|---------|--------------------|
| Scg5         | up      | 4                  |
| Serpina3n    | up      | 4                  |
| Pla2g4e      | up      | 3                  |
| H2-B1        | up      | 3                  |
| Hddc3        | up      | 3                  |
| Rwdd3        | up      | 3                  |
| Adi1         | up      | 3                  |
| Rsph1        | up      | 3                  |
| Olfml1       | up      | 3                  |
| Ccl17        | up      | 2                  |
| 5430405H02Ri |         |                    |
| k            | up      | 2                  |
| Hemk1        | up      | 2                  |
| Anxa4        | up      | 2                  |
| Lpl          | up      | 2                  |
| Idi2         | up      | 2                  |
| Abhd1        | up      | 2                  |
| Syt11        | up      | 2                  |
| Masp2        | up      | 2                  |
| Cfap54       | up      | 2                  |
| Myl1         | up      | 2                  |
| AA465934     | up      | 2                  |
| A930015D03R  |         |                    |
| ik           | up      | 2                  |
| Cap1         | up      | 2                  |
| Wdr63        | up      | 2                  |
| Gm10704      | up      | 2                  |
| Gm5067       | up      | 2                  |
| Cox7b2       | up      | 2                  |
| Flywch2      | up      | 2                  |
| Mns1         | up      | 2                  |
| Scn11a       | up      | 2                  |
| Lrat         | up      | 2                  |
| Gm15459      | up      | 2                  |
| Mamdc2       | up      | 2                  |
| Gm15487      | up      | 2                  |
| Slpi         | up      | 2                  |
| Gm15975      | up      | 2                  |
| Gm6969       | up      | 2                  |
| Gm15631      | up      | 2                  |
| Trappc6a     | up      | 2                  |
| Gm11942      | up      | 2                  |
| Zfp457       | up      | 2                  |
| Gm6206       | up      | 2                  |
| Capn11       | up      | 2                  |
| Gpr15        | up      | 2                  |
| Otx2         | up      | 2                  |
| Prss41       | up      | 2                  |

|              |      |   |
|--------------|------|---|
| Cdhr1        | up   | 2 |
| Sfrp1        | up   | 2 |
| Dydc2        | up   | 2 |
| Ptprv        | up   | 2 |
| 2700038G22Ri |      |   |
| k            | up   | 2 |
| Amd2         | up   | 2 |
| Gm13456      | up   | 2 |
| Myh6         | up   | 2 |
| 4930429F24Ri |      |   |
| k            | up   | 2 |
| Prss56       | up   | 2 |
| Gm10282      | up   | 2 |
| Tmem72       | up   | 2 |
| Plk1         | up   | 2 |
| Gm10060      | up   | 2 |
| Tekt1        | up   | 2 |
| Fam198b      | up   | 2 |
| Rbm46        | up   | 2 |
| 4930481B07Ri |      |   |
| k            | up   | 2 |
| Gm1840       | up   | 2 |
| Scn10a       | up   | 2 |
| Sema3b       | up   | 2 |
| Marveld2     | up   | 2 |
| Folr1        | up   | 2 |
| Meox1        | up   | 2 |
| Sostdc1      | up   | 2 |
| Tnfrsf10b    | up   | 2 |
| Zmynd10      | up   | 2 |
| Fxyd2        | up   | 2 |
| Blvrb        | up   | 2 |
| 4930539E08Ri |      |   |
| k            | up   | 2 |
| B9d1         | up   | 2 |
| Fbxo6        | up   | 2 |
| 1190002H23Ri |      |   |
| k            | up   | 2 |
| C1qb         | down | 4 |
| Pop4         | down | 4 |
| Nudt19       | down | 4 |
| Anxa3        | down | 4 |
| Slc38a11     | down | 3 |
| Slc25a34     | down | 3 |
| Gm14169      | down | 3 |
| C030034I22Ri |      |   |
| k            | down | 3 |
| 4930479D17Ri |      |   |
| k            | down | 3 |
| Trim12a      | down | 3 |
| Cela1        | down | 3 |
| Hist1h2be    | down | 3 |

|              |      |   |
|--------------|------|---|
| Gm10033      | down | 3 |
| Gm5148       | down | 3 |
| Col2a1       | down | 3 |
| Crispld1     | down | 3 |
| Hist1h4i     | down | 3 |
| 2610507I01Ri |      |   |
| k            | down | 3 |
| Poc1a        | down | 3 |
| Pttg1        | down | 3 |
| Tdg          | down | 3 |
| 9030407P20Ri |      |   |
| k            | down | 3 |
| Trim30d      | down | 3 |
| Hjurp        | down | 3 |
| Krt12        | down | 3 |
| 6330403K07Ri |      |   |
| k            | down | 3 |
| Gm12394      | down | 2 |
| Crocc        | down | 2 |
| Gpr84        | down | 2 |
| Ptpre        | down | 2 |
| Aqr          | down | 2 |
| Lym7         | down | 2 |
| Mcmdc2       | down | 2 |
| Thbs4        | down | 2 |
| Myh7         | down | 2 |
| Tmem260      | down | 2 |
| Adgrf4       | down | 2 |
| Zfp85os      | down | 2 |
| Zfp984       | down | 2 |
| Gm10635      | down | 2 |
| Zfp125       | down | 2 |
| Gm20208      | down | 2 |
| 2810002D19Ri |      |   |
| k            | down | 2 |
| Zfp982       | down | 2 |
| Adam18       | down | 2 |
| Frrs11       | down | 2 |
| Myoc         | down | 2 |
| Nanos2       | down | 2 |
| Gm29514      | down | 2 |
| Mall         | down | 2 |
| Tmem159      | down | 2 |
| Stac2        | down | 2 |
| Scoc         | down | 2 |
| Rbbp9        | down | 2 |
| Alg1         | down | 2 |
| Rpp25        | down | 2 |
| Fgfr1op2     | down | 2 |
| Mt3          | down | 2 |
| Slc25a3      | down | 2 |
| Zmynd11      | down | 2 |

|              |      |   |
|--------------|------|---|
| Mmp28        | down | 2 |
| 9330104G04Ri |      |   |
| k            | down | 2 |
| Ferls        | down | 2 |
| 1700010I14Ri |      |   |
| k            | down | 2 |
| 9330151L19Ri |      |   |
| k            | down | 2 |
| Tnni1        | down | 2 |
| Sfn          | down | 2 |
| Tubb6        | down | 2 |
| Myo7a        | down | 2 |
| 4930503L19Ri |      |   |
| k            | down | 2 |
| Pglyrp1      | down | 2 |
| Sema3g       | down | 2 |
| Gm9866       | down | 2 |
| Pdlim2       | down | 2 |
| Impg1        | down | 2 |
| Ncf2         | down | 2 |
| Hpgd         | down | 2 |
| B230217O12R  |      |   |
| ik           | down | 2 |
| A830036E02R  |      |   |
| ik           | down | 2 |
| Rec8         | down | 2 |
| Col6a4       | down | 2 |
| Cmya5        | down | 2 |
| Gm5083       | down | 2 |
| Arhgef19     | down | 2 |
| Lmod1        | down | 2 |
| Slfn8        | down | 2 |
| Gstm6        | down | 2 |
| Nkx2-9       | down | 2 |
| Gpr160       | down | 2 |
| Sp110        | down | 2 |
| Alox8        | down | 2 |
| Myl6b        | down | 2 |
| 4833420G17Ri |      |   |
| k            | down | 2 |
| Ifi203       | down | 2 |
| Oscar        | down | 2 |
| Slc37a2      | down | 2 |
| Eps8l1       | down | 2 |
| Gm6970       | down | 2 |
| Hfm1         | down | 2 |
| Darc         | down | 2 |
| C1qc         | down | 2 |
| B2m          | down | 2 |
| Ddit4l       | down | 2 |
| Crym         | down | 2 |
| Il33         | down | 2 |

|           |      |   |
|-----------|------|---|
| Mobp      | down | 2 |
| Myl4      | down | 2 |
| Rnps1     | down | 2 |
| Rpl29     | down | 2 |
| Hist1h2ao | down | 2 |
| Tnnc1     | down | 2 |
| Cort      | down | 2 |
| Cox6a2    | down | 2 |

| Year | Month | Day | Event                      | Location | Category       | Notes |
|------|-------|-----|----------------------------|----------|----------------|-------|
| 1999 | 1     | 1   | New Year's Day             | Global   | Public Holiday |       |
| 1999 | 1     | 2   | Martin Luther King Jr. Day | USA      | Public Holiday |       |
| 1999 | 1     | 3   | January 3rd                | Global   | Regular Day    |       |
| 1999 | 1     | 4   | January 4th                | Global   | Regular Day    |       |
| 1999 | 1     | 5   | January 5th                | Global   | Regular Day    |       |
| 1999 | 1     | 6   | January 6th                | Global   | Regular Day    |       |
| 1999 | 1     | 7   | January 7th                | Global   | Regular Day    |       |
| 1999 | 1     | 8   | January 8th                | Global   | Regular Day    |       |
| 1999 | 1     | 9   | January 9th                | Global   | Regular Day    |       |
| 1999 | 1     | 10  | January 10th               | Global   | Regular Day    |       |
| 1999 | 1     | 11  | January 11th               | Global   | Regular Day    |       |
| 1999 | 1     | 12  | January 12th               | Global   | Regular Day    |       |
| 1999 | 1     | 13  | January 13th               | Global   | Regular Day    |       |
| 1999 | 1     | 14  | January 14th               | Global   | Regular Day    |       |
| 1999 | 1     | 15  | January 15th               | Global   | Regular Day    |       |
| 1999 | 1     | 16  | January 16th               | Global   | Regular Day    |       |
| 1999 | 1     | 17  | January 17th               | Global   | Regular Day    |       |
| 1999 | 1     | 18  | January 18th               | Global   | Regular Day    |       |
| 1999 | 1     | 19  | January 19th               | Global   | Regular Day    |       |
| 1999 | 1     | 20  | January 20th               | Global   | Regular Day    |       |
| 1999 | 1     | 21  | January 21st               | Global   | Regular Day    |       |
| 1999 | 1     | 22  | January 22nd               | Global   | Regular Day    |       |
| 1999 | 1     | 23  | January 23rd               | Global   | Regular Day    |       |
| 1999 | 1     | 24  | January 24th               | Global   | Regular Day    |       |
| 1999 | 1     | 25  | January 25th               | Global   | Regular Day    |       |
| 1999 | 1     | 26  | January 26th               | Global   | Regular Day    |       |
| 1999 | 1     | 27  | January 27th               | Global   | Regular Day    |       |
| 1999 | 1     | 28  | January 28th               | Global   | Regular Day    |       |
| 1999 | 1     | 29  | January 29th               | Global   | Regular Day    |       |
| 1999 | 1     | 30  | January 30th               | Global   | Regular Day    |       |
| 1999 | 1     | 31  | January 31st               | Global   | Regular Day    |       |
| 1999 | 2     | 1   | February 1st               | Global   | Regular Day    |       |
| 1999 | 2     | 2   | February 2nd               | Global   | Regular Day    |       |
| 1999 | 2     | 3   | February 3rd               | Global   | Regular Day    |       |
| 1999 | 2     | 4   | February 4th               | Global   | Regular Day    |       |
| 1999 | 2     | 5   | February 5th               | Global   | Regular Day    |       |
| 1999 | 2     | 6   | February 6th               | Global   | Regular Day    |       |
| 1999 | 2     | 7   | February 7th               | Global   | Regular Day    |       |
| 1999 | 2     | 8   | February 8th               | Global   | Regular Day    |       |
| 1999 | 2     | 9   | February 9th               | Global   | Regular Day    |       |
| 1999 | 2     | 10  | February 10th              | Global   | Regular Day    |       |
| 1999 | 2     | 11  | February 11th              | Global   | Regular Day    |       |
| 1999 | 2     | 12  | February 12th              | Global   | Regular Day    |       |
| 1999 | 2     | 13  | February 13th              | Global   | Regular Day    |       |
| 1999 | 2     | 14  | February 14th              | Global   | Regular Day    |       |
| 1999 | 2     | 15  | February 15th              | Global   | Regular Day    |       |
| 1999 | 2     | 16  | February 16th              | Global   | Regular Day    |       |
| 1999 | 2     | 17  | February 17th              | Global   | Regular Day    |       |
| 1999 | 2     | 18  | February 18th              | Global   | Regular Day    |       |
| 1999 | 2     | 19  | February 19th              | Global   | Regular Day    |       |
| 1999 | 2     | 20  | February 20th              | Global   | Regular Day    |       |
| 1999 | 2     | 21  | February 21st              | Global   | Regular Day    |       |
| 1999 | 2     | 22  | February 22nd              | Global   | Regular Day    |       |
| 1999 | 2     | 23  | February 23rd              | Global   | Regular Day    |       |
| 1999 | 2     | 24  | February 24th              | Global   | Regular Day    |       |
| 1999 | 2     | 25  | February 25th              | Global   | Regular Day    |       |
| 1999 | 2     | 26  | February 26th              | Global   | Regular Day    |       |
| 1999 | 2     | 27  | February 27th              | Global   | Regular Day    |       |
| 1999 | 2     | 28  | February 28th              | Global   | Regular Day    |       |
| 1999 | 2     | 29  | February 29th              | Global   | Regular Day    |       |
| 1999 | 3     | 1   | March 1st                  | Global   | Regular Day    |       |
| 1999 | 3     | 2   | March 2nd                  | Global   | Regular Day    |       |
| 1999 | 3     | 3   | March 3rd                  | Global   | Regular Day    |       |
| 1999 | 3     | 4   | March 4th                  | Global   | Regular Day    |       |
| 1999 | 3     | 5   | March 5th                  | Global   | Regular Day    |       |
| 1999 | 3     | 6   | March 6th                  | Global   | Regular Day    |       |
| 1999 | 3     | 7   | March 7th                  | Global   | Regular Day    |       |
| 1999 | 3     | 8   | March 8th                  | Global   | Regular Day    |       |
| 1999 | 3     | 9   | March 9th                  | Global   | Regular Day    |       |
| 1999 | 3     | 10  | March 10th                 | Global   | Regular Day    |       |
| 1999 | 3     | 11  | March 11th                 | Global   | Regular Day    |       |
| 1999 | 3     | 12  | March 12th                 | Global   | Regular Day    |       |
| 1999 | 3     | 13  | March 13th                 | Global   | Regular Day    |       |
| 1999 | 3     | 14  | March 14th                 | Global   | Regular Day    |       |
| 1999 | 3     | 15  | March 15th                 | Global   | Regular Day    |       |
| 1999 | 3     | 16  | March 16th                 | Global   | Regular Day    |       |
| 1999 | 3     | 17  | March 17th                 | Global   | Regular Day    |       |
| 1999 | 3     | 18  | March 18th                 | Global   | Regular Day    |       |
| 1999 | 3     | 19  | March 19th                 | Global   | Regular Day    |       |
| 1999 | 3     | 20  | March 20th                 | Global   | Regular Day    |       |
| 1999 | 3     | 21  | March 21st                 | Global   | Regular Day    |       |
| 1999 | 3     | 22  | March 22nd                 | Global   | Regular Day    |       |
| 1999 | 3     | 23  | March 23rd                 | Global   | Regular Day    |       |
| 1999 | 3     | 24  | March 24th                 | Global   | Regular Day    |       |
| 1999 | 3     | 25  | March 25th                 | Global   | Regular Day    |       |
| 1999 | 3     | 26  | March 26th                 | Global   | Regular Day    |       |
| 1999 | 3     | 27  | March 27th                 | Global   | Regular Day    |       |
| 1999 | 3     | 28  | March 28th                 | Global   | Regular Day    |       |
| 1999 | 3     | 29  | March 29th                 | Global   | Regular Day    |       |
| 1999 | 3     | 30  | March 30th                 | Global   | Regular Day    |       |
| 1999 | 3     | 31  | March 31st                 | Global   | Regular Day    |       |
| 1999 | 4     | 1   | April 1st                  | Global   | Regular Day    |       |
| 1999 | 4     | 2   | April 2nd                  | Global   | Regular Day    |       |
| 1999 | 4     | 3   | April 3rd                  | Global   | Regular Day    |       |
| 1999 | 4     | 4   | April 4th                  | Global   | Regular Day    |       |
| 1999 | 4     | 5   | April 5th                  | Global   | Regular Day    |       |
| 1999 | 4     | 6   | April 6th                  | Global   | Regular Day    |       |
| 1999 | 4     | 7   | April 7th                  | Global   | Regular Day    |       |
| 1999 | 4     | 8   | April 8th                  | Global   | Regular Day    |       |
| 1999 | 4     | 9   | April 9th                  | Global   | Regular Day    |       |
| 1999 | 4     | 10  | April 10th                 | Global   | Regular Day    |       |
| 1999 | 4     | 11  | April 11th                 | Global   | Regular Day    |       |
| 1999 | 4     | 12  | April 12th                 | Global   | Regular Day    |       |
| 1999 | 4     | 13  | April 13th                 | Global   | Regular Day    |       |
| 1999 | 4     | 14  | April 14th                 | Global   | Regular Day    |       |
| 1999 | 4     | 15  | April 15th                 | Global   | Regular Day    |       |
| 1999 | 4     | 16  | April 16th                 | Global   | Regular Day    |       |
| 1999 | 4     | 17  | April 17th                 | Global   | Regular Day    |       |
| 1999 | 4     | 18  | April 18th                 | Global   | Regular Day    |       |
| 1999 | 4     | 19  | April 19th                 | Global   | Regular Day    |       |
| 1999 | 4     | 20  | April 20th                 | Global   | Regular Day    |       |
| 1999 | 4     | 21  | April 21st                 | Global   | Regular Day    |       |
| 1999 | 4     | 22  | April 22nd                 | Global   | Regular Day    |       |
| 1999 | 4     | 23  | April 23rd                 | Global   | Regular Day    |       |
| 1999 | 4     | 24  | April 24th                 | Global   | Regular Day    |       |
| 1999 | 4     | 25  | April 25th                 | Global   | Regular Day    |       |
| 1999 | 4     | 26  | April 26th                 | Global   | Regular Day    |       |
| 1999 | 4     | 27  | April 27th                 | Global   | Regular Day    |       |
| 1999 | 4     | 28  | April 28th                 | Global   | Regular Day    |       |
| 1999 | 4     | 29  | April 29th                 | Global   | Regular Day    |       |
| 1999 | 4     | 30  | April 30th                 | Global   | Regular Day    |       |
| 1999 | 5     | 1   | May 1st                    | Global   | Regular Day    |       |
| 1999 | 5     | 2   | May 2nd                    | Global   | Regular Day    |       |
| 1999 | 5     | 3   | May 3rd                    | Global   | Regular Day    |       |
| 1999 | 5     | 4   | May 4th                    | Global   | Regular Day    |       |
| 1999 | 5     | 5   | May 5th                    | Global   | Regular Day    |       |
| 1999 | 5     | 6   | May 6th                    | Global   | Regular Day    |       |
| 1999 | 5     | 7   | May 7th                    | Global   | Regular Day    |       |
| 1999 | 5     | 8   | May 8th                    | Global   | Regular Day    |       |
| 1999 | 5     | 9   | May 9th                    | Global   | Regular Day    |       |
| 1999 | 5     | 10  | May 10th                   | Global   | Regular Day    |       |
| 1999 | 5     | 11  | May 11th                   | Global   | Regular Day    |       |
| 1999 | 5     | 12  | May 12th                   | Global   | Regular Day    |       |
| 1999 | 5     | 13  | May 13th                   | Global   | Regular Day    |       |
| 1999 | 5     | 14  | May 14th                   | Global   | Regular Day    |       |
| 1999 | 5     | 15  | May 15th                   | Global   | Regular Day    |       |
| 1999 | 5     | 16  | May 16th                   | Global   | Regular Day    |       |
| 1999 | 5     | 17  | May 17th                   | Global   | Regular Day    |       |
| 1999 | 5     | 18  | May 18th                   | Global   | Regular Day    |       |
| 1999 | 5     | 19  | May 19th                   | Global   | Regular Day    |       |
| 1999 | 5     | 20  | May 20th                   | Global   | Regular Day    |       |
| 1999 | 5     | 21  | May 21st                   | Global   | Regular Day    |       |
| 1999 | 5     | 22  | May 22nd                   | Global   | Regular Day    |       |
| 1999 | 5     | 23  | May 23rd                   | Global   | Regular Day    |       |
| 1999 | 5     | 24  | May 24th                   | Global   | Regular Day    |       |
| 1999 | 5     | 25  | May 25th                   | Global   | Regular Day    |       |
| 1999 | 5     | 26  | May 26th                   | Global   | Regular Day    |       |
| 1999 | 5     | 27  | May 27th                   | Global   | Regular Day    |       |
| 1999 | 5     | 28  | May 28th                   | Global   | Regular Day    |       |
| 1999 | 5     | 29  | May 29th                   | Global   | Regular Day    |       |
| 1999 | 5     | 30  | May 30th                   | Global   | Regular Day    |       |
| 1999 | 5     | 31  | May 31st                   | Global   | Regular Day    |       |
| 1999 | 6     | 1   | June 1st                   | Global   | Regular Day    |       |
| 1999 | 6     | 2   | June 2nd                   | Global   | Regular Day    |       |
| 1999 | 6     | 3   | June 3rd                   | Global   | Regular Day    |       |
| 1999 | 6     | 4   | June 4th                   | Global   | Regular Day    |       |
| 1999 | 6     | 5   | June 5th                   | Global   | Regular Day    |       |
| 1999 | 6     | 6   | June 6th                   | Global   | Regular Day    |       |
| 1999 | 6     | 7   | June 7th                   | Global   | Regular Day    |       |
| 1999 | 6     | 8   | June 8th                   | Global   | Regular Day    |       |
| 1999 | 6     | 9   | June 9th                   | Global   | Regular Day    |       |
| 1999 | 6     | 10  | June 10th                  | Global   | Regular Day    |       |
| 1999 | 6     | 11  | June 11th                  | Global   | Regular Day    |       |
| 1999 | 6     | 12  | June 12th                  | Global   | Regular Day    |       |
| 1999 | 6     | 13  | June 13th                  | Global   | Regular Day    |       |
| 1999 | 6     | 14  | June 14th                  | Global   | Regular Day    |       |
| 1999 | 6     | 15  | June 15th                  | Global   | Regular Day    |       |
| 1999 | 6     | 16  | June 16th                  | Global   | Regular Day    |       |
| 1999 | 6     | 17  | June 17th                  | Global   | Regular Day    |       |
| 1999 | 6     | 18  | June 18th                  | Global   | Regular Day    |       |
| 1999 | 6     | 19  | June 19th                  | Global   | Regular Day    |       |
| 1999 | 6     | 20  | June 20th                  | Global   | Regular Day    |       |
| 1999 | 6     | 21  | June 21st                  | Global   | Regular Day    |       |
| 1999 | 6     | 22  | June 22nd                  | Global   | Regular Day    |       |
| 1999 | 6     | 23  | June 23rd                  | Global   | Regular Day    |       |
| 1999 | 6     | 24  | June 24th                  | Global   | Regular Day    |       |
| 1999 | 6     | 25  | June 25th                  | Global   | Regular Day    |       |
| 1999 | 6     | 26  | June 26th                  | Global   | Regular Day    |       |
| 1999 | 6     | 27  | June 27th                  | Global   | Regular Day    |       |
| 1999 | 6     | 28  | June 28th                  | Global   | Regular Day    |       |
| 1999 | 6     | 29  | June 29th                  | Global   | Regular Day    |       |
| 1999 | 6     | 30  | June 30th                  | Global   | Regular Day    |       |
| 1999 | 7     | 1   | July 1st                   | Global   | Regular Day    |       |
| 1999 | 7     | 2   | July 2nd                   | Global   | Regular Day    |       |
| 1999 | 7     | 3   | July 3rd                   | Global   | Regular Day    |       |
| 1999 | 7     | 4   | July 4th                   | Global   | Regular Day    |       |
| 1999 | 7     | 5   | July 5th                   | Global   | Regular Day    |       |
| 1999 | 7     | 6   | July 6th                   | Global   | Regular Day    |       |
| 1999 | 7     | 7   | July 7th                   | Global   | Regular Day    |       |
| 1999 | 7     | 8   | July 8th                   | Global   | Regular Day    |       |
| 1999 | 7     | 9   | July 9th                   | Global   | Regular Day    |       |
| 1999 | 7     | 10  | July 10th                  | Global   | Regular Day    |       |
| 1999 | 7     | 11  | July 11th                  | Global   | Regular Day    |       |
| 1999 | 7     | 12  | July 12th                  | Global   | Regular Day    |       |
| 1999 | 7     | 13  | July 13th                  | Global   | Regular Day    |       |
| 1999 | 7     | 14  | July 14th                  | Global   | Regular Day    |       |
| 1999 | 7     | 15  | July 15th                  | Global   | Regular Day    |       |
| 1999 | 7     | 16  | July 16th                  | Global   | Regular Day    |       |
| 1999 | 7     | 17  | July 17th                  | Global   | Regular Day    |       |
| 1999 | 7     | 18  | July 18th                  | Global   | Regular Day    |       |
| 1999 | 7     | 19  | July 19th                  | Global   | Regular Day    |       |
| 1999 | 7     | 20  | July 20th                  | Global   | Regular Day    |       |
| 1999 | 7     | 21  | July 21st                  | Global   | Regular Day    |       |
| 1999 | 7     | 22  | July 22nd                  | Global   | Regular Day    |       |
| 1999 | 7     | 23  | July 23rd                  | Global   | Regular Day    |       |
| 1999 | 7     | 24  | July 24th                  | Global   | Regular Day    |       |
| 1999 | 7     | 25  | July 25th                  | Global   | Regular Day    |       |
| 1999 | 7     | 26  | July 26th                  | Global   | Regular Day    |       |
| 1999 | 7     | 27  | July 27th                  | Global   | Regular Day    |       |
| 1999 | 7     | 28  | July 28th                  | Global   | Regular Day    |       |
| 1999 | 7     | 29  | July 29th                  | Global   | Regular Day    |       |
| 1999 | 7     | 30  | July 30th                  | Global   | Regular Day    |       |
| 1999 | 7     | 31  | July 31st                  | Global   | Regular Day    |       |
| 1999 | 8     | 1   | August 1st                 | Global   | Regular Day    |       |
| 1999 | 8     | 2   | August 2nd                 | Global   | Regular Day    |       |
| 1999 | 8     | 3   | August 3rd                 | Global   | Regular Day    |       |
| 1999 | 8     | 4   | August 4th                 | Global   | Regular Day    |       |
| 1999 | 8     | 5   | August 5th                 | Global   | Regular Day    |       |
| 1999 | 8     | 6   | August 6th                 | Global   | Regular Day    |       |
| 1999 | 8     | 7   | August 7th                 | Global   | Regular Day    |       |
| 1999 | 8     | 8   | August 8th                 | Global   | Regular Day    |       |
| 1999 | 8     | 9   | August 9th                 | Global   | Regular Day    |       |
| 1999 | 8     | 10  | August 10th                | Global   | Regular Day    |       |
| 1999 | 8     | 11  | August 11th                | Global   | Regular Day    |       |
| 1999 | 8     | 12  | August 12th                | Global   | Regular Day    |       |
| 1999 | 8     | 13  | August 13th                | Global   | Regular Day    |       |
| 1999 | 8     | 14  | August 14th                | Global   | Regular Day    |       |
| 1999 | 8     | 15  | August 15th                | Global   | Regular Day    |       |
| 1999 | 8     | 16  | August 16th                | Global   | Regular Day    |       |
| 1999 | 8     | 17  | August 17th                | Global   | Regular Day    |       |
| 1999 | 8     | 18  | August 18th                |          |                |       |



| id  | name          | email                     | phone        | address                                   |
|-----|---------------|---------------------------|--------------|-------------------------------------------|
| 1   | John Doe      | john.doe@example.com      | 123 456 7890 | 123 Main St, New York, NY 10001           |
| 2   | Jane Smith    | jane.smith@example.com    | 987 654 3210 | 456 Elm St, Los Angeles, CA 90001         |
| 3   | Bob Johnson   | bob.johnson@example.com   | 555 123 4567 | 789 Oak St, Chicago, IL 60601             |
| 4   | Alice Brown   | alice.brown@example.com   | 222 333 4444 | 101 Pine St, San Francisco, CA 94101      |
| 5   | Charlie Davis | charlie.davis@example.com | 111 222 3333 | 202 Cedar St, Boston, MA 02101            |
| 6   | Diana Prince  | diana.prince@example.com  | 444 555 6666 | 303 Birch St, Seattle, WA 98101           |
| 7   | Frank Miller  | frank.miller@example.com  | 777 888 9999 | 404 Spruce St, Portland, OR 97201         |
| 8   | Grace Wilson  | grace.wilson@example.com  | 100 200 3000 | 505 Ash St, Denver, CO 80201              |
| 9   | Henry Taylor  | henry.taylor@example.com  | 600 700 8000 | 606 Hickory St, Austin, TX 78701          |
| 10  | Ivy White     | ivy.white@example.com     | 900 100 2000 | 707 Maple St, San Diego, CA 92101         |
| 11  | Jack Black    | jack.black@example.com    | 300 400 5000 | 808 Elm St, Dallas, TX 75201              |
| 12  | Karen Green   | karen.green@example.com   | 600 700 8000 | 909 Oak St, Houston, TX 77001             |
| 13  | Liam King     | liam.king@example.com     | 100 200 3000 | 1010 Pine St, Phoenix, AZ 85001           |
| 14  | Mia Lee       | mia.lee@example.com       | 400 500 6000 | 1111 Cedar St, San Jose, CA 95101         |
| 15  | Noah Hall     | noah.hall@example.com     | 700 800 9000 | 1212 Birch St, San Antonio, TX 78201      |
| 16  | Olivia Scott  | olivia.scott@example.com  | 100 200 3000 | 1313 Spruce St, San Luis Obispo, CA 93401 |
| 17  | Peter King    | peter.king@example.com    | 400 500 6000 | 1414 Ash St, Santa Barbara, CA 93101      |
| 18  | Quinn Adams   | quinn.adams@example.com   | 700 800 9000 | 1515 Hickory St, Santa Cruz, CA 95060     |
| 19  | Rachel Baker  | rachel.baker@example.com  | 100 200 3000 | 1616 Maple St, Santa Monica, CA 90401     |
| 20  | Samuel Carter | samuel.carter@example.com | 400 500 6000 | 1717 Elm St, Santa Clara, CA 95050        |
| 21  | Tina Evans    | tina.evans@example.com    | 700 800 9000 | 1818 Oak St, Santa Cruz, CA 95060         |
| 22  | Uma Garcia    | uma.garcia@example.com    | 100 200 3000 | 1919 Pine St, Santa Cruz, CA 95060        |
| 23  | Victor Hill   | victor.hill@example.com   | 400 500 6000 | 2020 Cedar St, Santa Cruz, CA 95060       |
| 24  | Wendy King    | wendy.king@example.com    | 700 800 9000 | 2121 Birch St, Santa Cruz, CA 95060       |
| 25  | Xavier Lee    | xavier.lee@example.com    | 100 200 3000 | 2222 Spruce St, Santa Cruz, CA 95060      |
| 26  | Yara Miller   | yara.miller@example.com   | 400 500 6000 | 2323 Ash St, Santa Cruz, CA 95060         |
| 27  | Zoe Wilson    | zoe.wilson@example.com    | 700 800 9000 | 2424 Hickory St, Santa Cruz, CA 95060     |
| 28  | Adam Brown    | adam.brown@example.com    | 100 200 3000 | 2525 Maple St, Santa Cruz, CA 95060       |
| 29  | Bella Davis   | bella.davis@example.com   | 400 500 6000 | 2626 Elm St, Santa Cruz, CA 95060         |
| 30  | Chris Evans   | chris.evans@example.com   | 700 800 9000 | 2727 Oak St, Santa Cruz, CA 95060         |
| 31  | Diana Prince  | diana.prince@example.com  | 100 200 3000 | 2828 Pine St, Santa Cruz, CA 95060        |
| 32  | Frank Miller  | frank.miller@example.com  | 400 500 6000 | 2929 Cedar St, Santa Cruz, CA 95060       |
| 33  | Grace Wilson  | grace.wilson@example.com  | 700 800 9000 | 3030 Birch St, Santa Cruz, CA 95060       |
| 34  | Henry Taylor  | henry.taylor@example.com  | 100 200 3000 | 3131 Spruce St, Santa Cruz, CA 95060      |
| 35  | Ivy White     | ivy.white@example.com     | 400 500 6000 | 3232 Ash St, Santa Cruz, CA 95060         |
| 36  | Jack Black    | jack.black@example.com    | 700 800 9000 | 3333 Hickory St, Santa Cruz, CA 95060     |
| 37  | Karen Green   | karen.green@example.com   | 100 200 3000 | 3434 Maple St, Santa Cruz, CA 95060       |
| 38  | Liam King     | liam.king@example.com     | 400 500 6000 | 3535 Elm St, Santa Cruz, CA 95060         |
| 39  | Mia Lee       | mia.lee@example.com       | 700 800 9000 | 3636 Oak St, Santa Cruz, CA 95060         |
| 40  | Noah Hall     | noah.hall@example.com     | 100 200 3000 | 3737 Pine St, Santa Cruz, CA 95060        |
| 41  | Olivia Scott  | olivia.scott@example.com  | 400 500 6000 | 3838 Cedar St, Santa Cruz, CA 95060       |
| 42  | Peter King    | peter.king@example.com    | 700 800 9000 | 3939 Birch St, Santa Cruz, CA 95060       |
| 43  | Quinn Adams   | quinn.adams@example.com   | 100 200 3000 | 4040 Spruce St, Santa Cruz, CA 95060      |
| 44  | Rachel Baker  | rachel.baker@example.com  | 400 500 6000 | 4141 Ash St, Santa Cruz, CA 95060         |
| 45  | Samuel Carter | samuel.carter@example.com | 700 800 9000 | 4242 Hickory St, Santa Cruz, CA 95060     |
| 46  | Tina Evans    | tina.evans@example.com    | 100 200 3000 | 4343 Maple St, Santa Cruz, CA 95060       |
| 47  | Uma Garcia    | uma.garcia@example.com    | 400 500 6000 | 4444 Elm St, Santa Cruz, CA 95060         |
| 48  | Victor Hill   | victor.hill@example.com   | 700 800 9000 | 4545 Oak St, Santa Cruz, CA 95060         |
| 49  | Wendy King    | wendy.king@example.com    | 100 200 3000 | 4646 Pine St, Santa Cruz, CA 95060        |
| 50  | Xavier Lee    | xavier.lee@example.com    | 400 500 6000 | 4747 Cedar St, Santa Cruz, CA 95060       |
| 51  | Yara Miller   | yara.miller@example.com   | 700 800 9000 | 4848 Birch St, Santa Cruz, CA 95060       |
| 52  | Zoe Wilson    | zoe.wilson@example.com    | 100 200 3000 | 4949 Spruce St, Santa Cruz, CA 95060      |
| 53  | Adam Brown    | adam.brown@example.com    | 400 500 6000 | 5050 Ash St, Santa Cruz, CA 95060         |
| 54  | Bella Davis   | bella.davis@example.com   | 700 800 9000 | 5151 Hickory St, Santa Cruz, CA 95060     |
| 55  | Chris Evans   | chris.evans@example.com   | 100 200 3000 | 5252 Maple St, Santa Cruz, CA 95060       |
| 56  | Diana Prince  | diana.prince@example.com  | 400 500 6000 | 5353 Elm St, Santa Cruz, CA 95060         |
| 57  | Frank Miller  | frank.miller@example.com  | 700 800 9000 | 5454 Oak St, Santa Cruz, CA 95060         |
| 58  | Grace Wilson  | grace.wilson@example.com  | 100 200 3000 | 5555 Pine St, Santa Cruz, CA 95060        |
| 59  | Henry Taylor  | henry.taylor@example.com  | 400 500 6000 | 5656 Cedar St, Santa Cruz, CA 95060       |
| 60  | Ivy White     | ivy.white@example.com     | 700 800 9000 | 5757 Birch St, Santa Cruz, CA 95060       |
| 61  | Jack Black    | jack.black@example.com    | 100 200 3000 | 5858 Spruce St, Santa Cruz, CA 95060      |
| 62  | Karen Green   | karen.green@example.com   | 400 500 6000 | 5959 Ash St, Santa Cruz, CA 95060         |
| 63  | Liam King     | liam.king@example.com     | 700 800 9000 | 6060 Hickory St, Santa Cruz, CA 95060     |
| 64  | Mia Lee       | mia.lee@example.com       | 100 200 3000 | 6161 Maple St, Santa Cruz, CA 95060       |
| 65  | Noah Hall     | noah.hall@example.com     | 400 500 6000 | 6262 Elm St, Santa Cruz, CA 95060         |
| 66  | Olivia Scott  | olivia.scott@example.com  | 700 800 9000 | 6363 Oak St, Santa Cruz, CA 95060         |
| 67  | Peter King    | peter.king@example.com    | 100 200 3000 | 6464 Pine St, Santa Cruz, CA 95060        |
| 68  | Quinn Adams   | quinn.adams@example.com   | 400 500 6000 | 6565 Cedar St, Santa Cruz, CA 95060       |
| 69  | Rachel Baker  | rachel.baker@example.com  | 700 800 9000 | 6666 Birch St, Santa Cruz, CA 95060       |
| 70  | Samuel Carter | samuel.carter@example.com | 100 200 3000 | 6767 Spruce St, Santa Cruz, CA 95060      |
| 71  | Tina Evans    | tina.evans@example.com    | 400 500 6000 | 6868 Ash St, Santa Cruz, CA 95060         |
| 72  | Uma Garcia    | uma.garcia@example.com    | 700 800 9000 | 6969 Hickory St, Santa Cruz, CA 95060     |
| 73  | Victor Hill   | victor.hill@example.com   | 100 200 3000 | 7070 Maple St, Santa Cruz, CA 95060       |
| 74  | Wendy King    | wendy.king@example.com    | 400 500 6000 | 7171 Elm St, Santa Cruz, CA 95060         |
| 75  | Xavier Lee    | xavier.lee@example.com    | 700 800 9000 | 7272 Oak St, Santa Cruz, CA 95060         |
| 76  | Yara Miller   | yara.miller@example.com   | 100 200 3000 | 7373 Pine St, Santa Cruz, CA 95060        |
| 77  | Zoe Wilson    | zoe.wilson@example.com    | 400 500 6000 | 7474 Cedar St, Santa Cruz, CA 95060       |
| 78  | Adam Brown    | adam.brown@example.com    | 700 800 9000 | 7575 Birch St, Santa Cruz, CA 95060       |
| 79  | Bella Davis   | bella.davis@example.com   | 100 200 3000 | 7676 Spruce St, Santa Cruz, CA 95060      |
| 80  | Chris Evans   | chris.evans@example.com   | 400 500 6000 | 7777 Ash St, Santa Cruz, CA 95060         |
| 81  | Diana Prince  | diana.prince@example.com  | 700 800 9000 | 7878 Hickory St, Santa Cruz, CA 95060     |
| 82  | Frank Miller  | frank.miller@example.com  | 100 200 3000 | 7979 Maple St, Santa Cruz, CA 95060       |
| 83  | Grace Wilson  | grace.wilson@example.com  | 400 500 6000 | 8080 Elm St, Santa Cruz, CA 95060         |
| 84  | Henry Taylor  | henry.taylor@example.com  | 700 800 9000 | 8181 Oak St, Santa Cruz, CA 95060         |
| 85  | Ivy White     | ivy.white@example.com     | 100 200 3000 | 8282 Pine St, Santa Cruz, CA 95060        |
| 86  | Jack Black    | jack.black@example.com    | 400 500 6000 | 8383 Cedar St, Santa Cruz, CA 95060       |
| 87  | Karen Green   | karen.green@example.com   | 700 800 9000 | 8484 Birch St, Santa Cruz, CA 95060       |
| 88  | Liam King     | liam.king@example.com     | 100 200 3000 | 8585 Spruce St, Santa Cruz, CA 95060      |
| 89  | Mia Lee       | mia.lee@example.com       | 400 500 6000 | 8686 Ash St, Santa Cruz, CA 95060         |
| 90  | Noah Hall     | noah.hall@example.com     | 700 800 9000 | 8787 Hickory St, Santa Cruz, CA 95060     |
| 91  | Olivia Scott  | olivia.scott@example.com  | 100 200 3000 | 8888 Maple St, Santa Cruz, CA 95060       |
| 92  | Peter King    | peter.king@example.com    | 400 500 6000 | 8989 Elm St, Santa Cruz, CA 95060         |
| 93  | Quinn Adams   | quinn.adams@example.com   | 700 800 9000 | 9090 Oak St, Santa Cruz, CA 95060         |
| 94  | Rachel Baker  | rachel.baker@example.com  | 100 200 3000 | 9191 Pine St, Santa Cruz, CA 95060        |
| 95  | Samuel Carter | samuel.carter@example.com | 400 500 6000 | 9292 Cedar St, Santa Cruz, CA 95060       |
| 96  | Tina Evans    | tina.evans@example.com    | 700 800 9000 | 9393 Birch St, Santa Cruz, CA 95060       |
| 97  | Uma Garcia    | uma.garcia@example.com    | 100 200 3000 | 9494 Spruce St, Santa Cruz, CA 95060      |
| 98  | Victor Hill   | victor.hill@example.com   | 400 500 6000 | 9595 Ash St, Santa Cruz, CA 95060         |
| 99  | Wendy King    | wendy.king@example.com    | 700 800 9000 | 9696 Hickory St, Santa Cruz, CA 95060     |
| 100 | Xavier Lee    | xavier.lee@example.com    | 100 200 3000 | 9797 Maple St, Santa Cruz, CA 95060       |



**Supplement Table S3.** The list of "high prediction score" mutations

| ID       | Location | Allele | Consequence        | IMPACT | SYMBOL        | Gene    | Feature_type | Feature | BIOTYPE        |
|----------|----------|--------|--------------------|--------|---------------|---------|--------------|---------|----------------|
| rs230570 | 1:994091 | T      | frameshift_variant | HIGH   | Mcmdc2        | ENSMUSG | Transcript   | ENSMUS  | protein_coding |
| rs262842 | 1:582106 | T      | frameshift_variant | HIGH   | Aox4          | ENSMUSG | Transcript   | ENSMUS  | protein_coding |
| rs251386 | 1:788181 | -      | frameshift_variant | HIGH   | Kcne4         | ENSMUSG | Transcript   | ENSMUS  | protein_coding |
| rs229447 | 1:860245 | C      | frameshift_variant | HIGH   | Spata3        | ENSMUSG | Transcript   | ENSMUS  | protein_coding |
| rs229447 | 1:860245 | C      | frameshift_variant | HIGH   | Spata3        | ENSMUSG | Transcript   | ENSMUS  | protein_coding |
| rs260403 | 1:153220 | -      | frameshift_variant | HIGH   | Lamc1         | ENSMUSG | Transcript   | ENSMUS  | protein_coding |
| rs245925 | 1:173270 | A      | frameshift_variant | HIGH   | Olfr418       | ENSMUSG | Transcript   | ENSMUS  | protein_coding |
| rs245925 | 1:173270 | A      | frameshift_variant | HIGH   | Olfr418       | ENSMUSG | Transcript   | ENSMUS  | protein_coding |
| rs241718 | 10:22148 | -      | frameshift_variant | HIGH   | E030030I06Rik | ENSMUSG | Transcript   | ENSMUS  | protein_coding |
| rs241718 | 10:22148 | -      | frameshift_variant | HIGH   | E030030I06Rik | ENSMUSG | Transcript   | ENSMUS  | protein_coding |
| rs262576 | 10:22148 | -      | frameshift_variant | HIGH   | E030030I06Rik | ENSMUSG | Transcript   | ENSMUS  | protein_coding |
| rs262576 | 10:22148 | -      | frameshift_variant | HIGH   | E030030I06Rik | ENSMUSG | Transcript   | ENSMUS  | protein_coding |
| rs232510 | 10:40603 | -      | frameshift_variant | HIGH   | Slc22a16      | ENSMUSG | Transcript   | ENSMUS  | protein_coding |
| rs232510 | 10:40603 | -      | frameshift_variant | HIGH   | Slc22a16      | ENSMUSG | Transcript   | ENSMUS  | protein_coding |
| rs260532 | 10:82652 | TG     | frameshift_variant | HIGH   | Glt8d2        | ENSMUSG | Transcript   | ENSMUS  | protein_coding |
| rs234015 | 10:88485 | -      | frameshift_variant | HIGH   | Chpt1         | ENSMUSG | Transcript   | ENSMUS  | protein_coding |
| rs247050 | 10:94293 | G      | frameshift_variant | HIGH   | Gm4792        | ENSMUSG | Transcript   | ENSMUS  | protein_coding |
| rs261855 | 11:66056 | -      | frameshift_variant | HIGH   | Nacad         | ENSMUSG | Transcript   | ENSMUS  | protein_coding |
| rs217059 | 11:18884 | AAAAA  | frameshift_variant | HIGH   | Meis1         | ENSMUSG | Transcript   | ENSMUS  | protein_coding |
| rs231892 | 11:32031 | A      | frameshift_variant | HIGH   | Nsg2          | ENSMUSG | Transcript   | ENSMUS  | protein_coding |
| rs241784 | 11:51651 | G      | frameshift_variant | HIGH   | D930048N14Rik | ENSMUSG | Transcript   | ENSMUS  | protein_coding |
| rs241784 | 11:51651 | G      | frameshift_variant | HIGH   | D930048N14Rik | ENSMUSG | Transcript   | ENSMUS  | protein_coding |
| rs224358 | 11:59161 | AG     | frameshift_variant | HIGH   | Iba57         | ENSMUSG | Transcript   | ENSMUS  | protein_coding |
| rs224358 | 11:59161 | AG     | frameshift_variant | HIGH   | Iba57         | ENSMUSG | Transcript   | ENSMUS  | protein_coding |
| rs251449 | 11:70940 | T      | frameshift_variant | HIGH   | Rabep1        | ENSMUSG | Transcript   | ENSMUS  | protein_coding |
| rs229784 | 11:72195 | -      | frameshift_variant | HIGH   | 4933427D14Rik | ENSMUSG | Transcript   | ENSMUS  | protein_coding |
| rs238372 | 11:72195 | CCCCAG | frameshift_variant | HIGH   | 4933427D14Rik | ENSMUSG | Transcript   | ENSMUS  | protein_coding |
| rs225446 | 11:72309 | GCTGGC | frameshift_variant | HIGH   | Xaf1          | ENSMUSG | Transcript   | ENSMUS  | protein_coding |
| rs224369 | 11:10231 | C      | frameshift_variant | HIGH   | Ubtf          | ENSMUSG | Transcript   | ENSMUS  | protein_coding |
| rs217001 | 11:10310 | GACTG  | frameshift_variant | HIGH   | Acbd4         | ENSMUSG | Transcript   | ENSMUS  | protein_coding |
| rs217001 | 11:10310 | GACTG  | frameshift_variant | HIGH   | Acbd4         | ENSMUSG | Transcript   | ENSMUS  | protein_coding |
| rs217001 | 11:10310 | GACTG  | frameshift_variant | HIGH   | Acbd4         | ENSMUSG | Transcript   | ENSMUS  | protein_coding |
| rs217001 | 11:10310 | GACTG  | frameshift_variant | HIGH   | Acbd4         | ENSMUSG | Transcript   | ENSMUS  | protein_coding |
| rs264572 | 11:10941 | G      | frameshift_variant | HIGH   | 9930022D16Rik | ENSMUSG | Transcript   | ENSMUS  | protein_coding |
| rs221497 | 11:11665 | -      | frameshift_variant | HIGH   | Pred          | ENSMUSG | Transcript   | ENSMUS  | protein_coding |
| rs215748 | 12:24708 | -      | frameshift_variant | HIGH   | Rrm2          | ENSMUSG | Transcript   | ENSMUS  | protein_coding |
| rs226317 | 12:75722 | -      | frameshift_variant | HIGH   | Sgpp1         | ENSMUSG | Transcript   | ENSMUS  | protein_coding |
| rs250615 | 12:98747 | G      | frameshift_variant | HIGH   | Zc3h14        | ENSMUSG | Transcript   | ENSMUS  | protein_coding |
| rs242560 | 12:10426 | -      | frameshift_variant | HIGH   | Serpina3i     | ENSMUSG | Transcript   | ENSMUS  | protein_coding |
| rs249591 | 13:21484 | A      | frameshift_variant | HIGH   | Zkscan4       | ENSMUSG | Transcript   | ENSMUS  | protein_coding |
| rs249591 | 13:21484 | A      | frameshift_variant | HIGH   | Zkscan4       | ENSMUSG | Transcript   | ENSMUS  | protein_coding |
| rs264679 | 13:22524 | -      | frameshift_variant | HIGH   | Vmn1r203      | ENSMUSG | Transcript   | ENSMUS  | protein_coding |
| rs264679 | 13:22524 | -      | frameshift_variant | HIGH   | Vmn1r203      | ENSMUSG | Transcript   | ENSMUS  | protein_coding |
| rs264679 | 13:22524 | -      | frameshift_variant | HIGH   | Vmn1r203      | ENSMUSG | Transcript   | ENSMUS  | protein_coding |
| rs255414 | 13:22883 | CA     | frameshift_variant | HIGH   | Vmn1r212      | ENSMUSG | Transcript   | ENSMUS  | protein_coding |
| rs255863 | 13:38022 | T      | frameshift_variant | HIGH   | Cage1         | ENSMUSG | Transcript   | ENSMUS  | protein_coding |
| rs254220 | 13:67408 | TGAG   | frameshift_variant | HIGH   | Zfp459        | ENSMUSG | Transcript   | ENSMUS  | protein_coding |
| rs241993 | 13:67792 | T      | frameshift_variant | HIGH   | Zfp493        | ENSMUSG | Transcript   | ENSMUS  | protein_coding |
| rs225890 | 13:11945 | -      | frameshift_variant | HIGH   | Paip1         | ENSMUSG | Transcript   | ENSMUS  | protein_coding |
| rs215802 | 14:29021 | -      | frameshift_variant | HIGH   | Lrtm1         | ENSMUSG | Transcript   | ENSMUS  | protein_coding |
| rs262913 | 14:54648 | -      | frameshift_variant | HIGH   | Gm17606       | ENSMUSG | Transcript   | ENSMUS  | protein_coding |
| rs264828 | 14:54976 | -      | frameshift_variant | HIGH   | Gm17428       | ENSMUSG | Transcript   | ENSMUS  | protein_coding |
| rs827433 | 14:56019 | -      | frameshift_variant | HIGH   | Mcpt1         | ENSMUSG | Transcript   | ENSMUS  | protein_coding |
| rs249051 | 14:79213 | C      | frameshift_variant | HIGH   | Zfp957        | ENSMUSG | Transcript   | ENSMUS  | protein_coding |
| rs249051 | 14:79213 | C      | frameshift_variant | HIGH   | Zfp957        | ENSMUSG | Transcript   | ENSMUS  | protein_coding |
| rs262301 | 15:82390 | TGGG   | frameshift_variant | HIGH   | Cyp2d11       | ENSMUSG | Transcript   | ENSMUS  | protein_coding |
| rs246193 | 16:52445 | -      | frameshift_variant | HIGH   | Alg1          | ENSMUSG | Transcript   | ENSMUS  | protein_coding |
| rs246193 | 16:52445 | -      | frameshift_variant | HIGH   | Alg1          | ENSMUSG | Transcript   | ENSMUS  | protein_coding |
| rs231313 | 16:58824 | A      | frameshift_variant | HIGH   | Olfr175       | ENSMUSG | Transcript   | ENSMUS  | protein_coding |
| rs231313 | 16:58824 | A      | frameshift_variant | HIGH   | Olfr175       | ENSMUSG | Transcript   | ENSMUS  | protein_coding |
| rs249006 | 17:23945 | -      | frameshift_variant | HIGH   | Sbp           | ENSMUSG | Transcript   | ENSMUS  | protein_coding |

|                           |                 |      |               |                    |                      |
|---------------------------|-----------------|------|---------------|--------------------|----------------------|
| rs2231971:17:29379(CTGA   | frameshift_vari | HIGH | Fgd2          | ENSMUSG Transcript | ENSMUSprotein_coding |
| rs2231971:17:29379(CTGA   | frameshift_vari | HIGH | Fgd2          | ENSMUSG Transcript | ENSMUSprotein_coding |
| rs2295961:17:29615 C      | frameshift_vari | HIGH | Rnf8          | ENSMUSG Transcript | ENSMUSprotein_coding |
| rs2248191:17:35893(CCCAAC | frameshift_vari | HIGH | 2310061104Rik | ENSMUSG Transcript | ENSMUSprotein_coding |
| rs2192701:17:36164(TT     | frameshift_vari | HIGH | Gm8909        | ENSMUSG Transcript | ENSMUSprotein_coding |
| rs2478811:17:74635' -     | frameshift_vari | HIGH | Birc6         | ENSMUSG Transcript | ENSMUSprotein_coding |
| rs2524591:18:70240(C      | frameshift_vari | HIGH | Dynap         | ENSMUSG Transcript | ENSMUSprotein_coding |
| rs2659271:18:78350(A      | frameshift_vari | HIGH | Gm6133        | ENSMUSG Transcript | ENSMUSprotein_coding |
| rs2659271:18:78350(GA     | frameshift_vari | HIGH | Gm6133        | ENSMUSG Transcript | ENSMUSprotein_coding |
| rs2659271:18:78350(GAAA   | frameshift_vari | HIGH | Gm6133        | ENSMUSG Transcript | ENSMUSprotein_coding |
| rs2551021:19:45797(CACGCA | frameshift_vari | HIGH | Kcnip2        | ENSMUSG Transcript | ENSMUSprotein_coding |
| rs2510851:2:313894(T      | frameshift_vari | HIGH | Hmcn2         | ENSMUSG Transcript | ENSMUSprotein_coding |
| rs241579(2:350432(-       | frameshift_vari | HIGH | Hc            | ENSMUSG Transcript | ENSMUSprotein_coding |
| rs2283261:2:101797(-      | frameshift_vari | HIGH | Prr5l         | ENSMUSG Transcript | ENSMUSprotein_coding |
| rs239279(2:111329(-       | frameshift_vari | HIGH | Olfr1281      | ENSMUSG Transcript | ENSMUSprotein_coding |
| rs239279(2:111329(-       | frameshift_vari | HIGH | Olfr1281      | ENSMUSG Transcript | ENSMUSprotein_coding |
| rs2473091:2:121014(-      | frameshift_vari | HIGH | Ccndbp1       | ENSMUSG Transcript | ENSMUSprotein_coding |
| rs2473091:2:121014(-      | frameshift_vari | HIGH | Ccndbp1       | ENSMUSG Transcript | ENSMUSprotein_coding |
| rs2236371:2:125154(C      | frameshift_vari | HIGH | Slc12a1       | ENSMUSG Transcript | ENSMUSprotein_coding |
| rs2236371:2:125154(C      | frameshift_vari | HIGH | Slc12a1       | ENSMUSG Transcript | ENSMUSprotein_coding |
| rs2236371:2:125154(C      | frameshift_vari | HIGH | Slc12a1       | ENSMUSG Transcript | ENSMUSprotein_coding |
| rs219714(2:152686(-       | frameshift_vari | HIGH | H13           | ENSMUSG Transcript | ENSMUSprotein_coding |
| rs2425131:2:164502(-      | frameshift_vari | HIGH | Pigt          | ENSMUSG Transcript | ENSMUSprotein_coding |
| rs2161301:2:164502(G      | frameshift_vari | HIGH | Pigt          | ENSMUSG Transcript | ENSMUSprotein_coding |
| rs2149581:2:164597(CC     | frameshift_vari | HIGH | Wfdc8         | ENSMUSG Transcript | ENSMUSprotein_coding |
| rs2267201:3:196104(TAAAAA | frameshift_vari | HIGH | 1700064H15Rik | ENSMUSG Transcript | ENSMUSprotein_coding |
| rs2269941:3:364818(C      | frameshift_vari | HIGH | 1810062G17Rik | ENSMUSG Transcript | ENSMUSprotein_coding |
| rs2437541:3:936516(CT     | frameshift_vari | HIGH | Tdpz2         | ENSMUSG Transcript | ENSMUSprotein_coding |
| rs2458391:3:945620 -      | frameshift_vari | HIGH | Snx27         | ENSMUSG Transcript | ENSMUSprotein_coding |
| rs2635061:3:122961(AG     | frameshift_vari | HIGH | Usp53         | ENSMUSG Transcript | ENSMUSprotein_coding |
| rs2465941:3:138941(-      | frameshift_vari | HIGH | Rap1gds1      | ENSMUSG Transcript | ENSMUSprotein_coding |
| rs2609101:4:340409(AA     | frameshift_vari | HIGH | Spaca1        | ENSMUSG Transcript | ENSMUSprotein_coding |
| rs2209241:4:634317(AACGT  | frameshift_vari | HIGH | Whrn          | ENSMUSG Transcript | ENSMUSprotein_coding |
| rs2472981:4:112773(-      | frameshift_vari | HIGH | Skint10       | ENSMUSG Transcript | ENSMUSprotein_coding |
| rs2395811:4:114244(T      | frameshift_vari | HIGH | Skint11       | ENSMUSG Transcript | ENSMUSprotein_coding |
| rs2395811:4:114244(T      | frameshift_vari | HIGH | Skint11       | ENSMUSG Transcript | ENSMUSprotein_coding |
| rs2615541:4:134279(TGTTTT | frameshift_vari | HIGH | Pdik11        | ENSMUSG Transcript | ENSMUSprotein_coding |
| rs2216121:4:141845 A      | frameshift_vari | HIGH | Ctrc          | ENSMUSG Transcript | ENSMUSprotein_coding |
| rs2216121:4:141845 A      | frameshift_vari | HIGH | Ctrc          | ENSMUSG Transcript | ENSMUSprotein_coding |
| rs233824(4:143699 -       | frameshift_vari | HIGH | Gm13089       | ENSMUSG Transcript | ENSMUSprotein_coding |
| rs3873351:4:143851(T      | frameshift_vari | HIGH | Gm13103       | ENSMUSG Transcript | ENSMUSprotein_coding |
| rs3873351:4:143851(T      | frameshift_vari | HIGH | Gm13103       | ENSMUSG Transcript | ENSMUSprotein_coding |
| rs3873351:4:143851(T      | frameshift_vari | HIGH | Gm13103       | ENSMUSG Transcript | ENSMUSprotein_coding |
| rs2354411:5:252201' -     | frameshift_vari | HIGH | Galnt5        | ENSMUSG Transcript | ENSMUSprotein_coding |
| rs2354411:5:252201' -     | frameshift_vari | HIGH | Galnt5        | ENSMUSG Transcript | ENSMUSprotein_coding |
| rs2484221:14:48446(C      | frameshift_vari | HIGH | Tmem260       | ENSMUSG Transcript | ENSMUSprotein_coding |
| rs2470331:5:310875(GTGAT  | frameshift_vari | HIGH | Slc30a3       | ENSMUSG Transcript | ENSMUSprotein_coding |
| rs228755(5:670976(C       | frameshift_vari | HIGH | Phox2b        | ENSMUSG Transcript | ENSMUSprotein_coding |
| rs2171951:5:145002(TCTG   | frameshift_vari | HIGH | Kpna7         | ENSMUSG Transcript | ENSMUSprotein_coding |
| rs2422241:5:145377(-      | frameshift_vari | HIGH | Cyp3a57       | ENSMUSG Transcript | ENSMUSprotein_coding |
| rs2443451:6:234100 -      | frameshift_vari | HIGH | Cadps2        | ENSMUSG Transcript | ENSMUSprotein_coding |
| rs2301171:6:898454(-      | frameshift_vari | HIGH | Vmn1r42       | ENSMUSG Transcript | ENSMUSprotein_coding |
| rs2301171:6:898454(-      | frameshift_vari | HIGH | Vmn1r42       | ENSMUSG Transcript | ENSMUSprotein_coding |
| rs2301171:6:898454(-      | frameshift_vari | HIGH | Vmn1r42       | ENSMUSG Transcript | ENSMUSprotein_coding |
| rs2319951:6:903454(-      | frameshift_vari | HIGH | Uroc1         | ENSMUSG Transcript | ENSMUSprotein_coding |
| rs243087(6:143217(GACA    | frameshift_vari | HIGH | Etnk1         | ENSMUSG Transcript | ENSMUSprotein_coding |
| rs2657221:7:369579' -     | frameshift_vari | HIGH | Tsen34        | ENSMUSG Transcript | ENSMUSprotein_coding |
| rs263212(7:132608(-       | frameshift_vari | HIGH | Zswim9        | ENSMUSG Transcript | ENSMUSprotein_coding |
| rs2186721:7:298356(-      | frameshift_vari | HIGH | Zfp940        | ENSMUSG Transcript | ENSMUSprotein_coding |
| rs2223411:7:302806(CTAAGA | frameshift_vari | HIGH | Thap8         | ENSMUSG Transcript | ENSMUSprotein_coding |
| rs2223411:7:302806(CTAAGA | frameshift_vari | HIGH | Thap8         | ENSMUSG Transcript | ENSMUSprotein_coding |
| rs2630811:7:356469(-      | frameshift_vari | HIGH | Pdc5          | ENSMUSG Transcript | ENSMUSprotein_coding |
| rs2531931:7:856197(-      | frameshift_vari | HIGH | Vmn2r71       | ENSMUSG Transcript | ENSMUSprotein_coding |
| rs2195671:7:867952(-      | frameshift_vari | HIGH | Vmn2r77       | ENSMUSG Transcript | ENSMUSprotein_coding |

|                           |                         |               |                     |                      |
|---------------------------|-------------------------|---------------|---------------------|----------------------|
| rs21956717:867952:-       | frameshift_variant HIGH | Vmn2r77       | ENSMUSG1 Transcript | ENSMUSprotein_coding |
| rs2554437:7:902364:G      | frameshift_variant HIGH | Ccdc83        | ENSMUSG1 Transcript | ENSMUSprotein_coding |
| rs2442577:7:930809:-      | frameshift_variant HIGH | Fam181b       | ENSMUSG1 Transcript | ENSMUSprotein_coding |
| rs2381477:7:100326:A      | frameshift_variant HIGH | Ppme1         | ENSMUSG1 Transcript | ENSMUSprotein_coding |
| rs2170087:7:102535(CAAAC  | frameshift_variant HIGH | Olfr547       | ENSMUSG1 Transcript | ENSMUSprotein_coding |
| rs2573737:7:102542(-      | frameshift_variant HIGH | Olfr548-ps1   | ENSMUSG1 Transcript | ENSMUSprotein_coding |
| rs2573737:7:102542(-      | frameshift_variant HIGH | Olfr548-ps1   | ENSMUSG1 Transcript | ENSMUSprotein_coding |
| rs2172637:7:102804:-      | frameshift_variant HIGH | Olfr564       | ENSMUSG1 Transcript | ENSMUSprotein_coding |
| rs2498857:7:102942:-      | frameshift_variant HIGH | Olfr573-ps1   | ENSMUSG1 Transcript | ENSMUSprotein_coding |
| rs2498857:7:102942:-      | frameshift_variant HIGH | Olfr573-ps1   | ENSMUSG1 Transcript | ENSMUSprotein_coding |
| rs2266907:7:102942:-      | frameshift_variant HIGH | Olfr573-ps1   | ENSMUSG1 Transcript | ENSMUSprotein_coding |
| rs2266907:7:102942:-      | frameshift_variant HIGH | Olfr573-ps1   | ENSMUSG1 Transcript | ENSMUSprotein_coding |
| rs2467297:7:103682(-      | frameshift_variant HIGH | Olfr625-ps1   | ENSMUSG1 Transcript | ENSMUSprotein_coding |
| rs2467297:7:103682(-      | frameshift_variant HIGH | Olfr625-ps1   | ENSMUSG1 Transcript | ENSMUSprotein_coding |
| rs2419217:7:104357:G      | frameshift_variant HIGH | Trim30b       | ENSMUSG1 Transcript | ENSMUSprotein_coding |
| rs3870937:7:106927:-      | frameshift_variant HIGH | Olfr709-ps1   | ENSMUSG1 Transcript | ENSMUSprotein_coding |
| rs3870937:7:106927:-      | frameshift_variant HIGH | Olfr709-ps1   | ENSMUSG1 Transcript | ENSMUSprotein_coding |
| rs2626107:7:107590:-      | frameshift_variant HIGH | Olfrml1       | ENSMUSG1 Transcript | ENSMUSprotein_coding |
| rs2267257:7:118442:GG     | frameshift_variant HIGH | Syt17         | ENSMUSG1 Transcript | ENSMUSprotein_coding |
| rs2592517:7:118510:-      | frameshift_variant HIGH | Coq7          | ENSMUSG1 Transcript | ENSMUSprotein_coding |
| rs2598927:7:139216(-      | frameshift_variant HIGH | Lrrc27        | ENSMUSG1 Transcript | ENSMUSprotein_coding |
| rs2233757:8:191263:TTTTTT | frameshift_variant HIGH | Defb34        | ENSMUSG1 Transcript | ENSMUSprotein_coding |
| rs2135907:8:260324:T      | frameshift_variant HIGH | Hook3         | ENSMUSG1 Transcript | ENSMUSprotein_coding |
| rs2393807:8:408989:CT     | frameshift_variant HIGH | Slc7a2        | ENSMUSG1 Transcript | ENSMUSprotein_coding |
| rs2474627:8:707301(-      | frameshift_variant HIGH | Pde4c         | ENSMUSG1 Transcript | ENSMUSprotein_coding |
| rs2268157:8:104182(-      | frameshift_variant HIGH | Bean1         | ENSMUSG1 Transcript | ENSMUSprotein_coding |
| rs2268157:8:104182(-      | frameshift_variant HIGH | Bean1         | ENSMUSG1 Transcript | ENSMUSprotein_coding |
| rs2277919:9:382921:T      | frameshift_variant HIGH | Olfr896-ps1   | ENSMUSG1 Transcript | ENSMUSprotein_coding |
| rs2277919:9:382921:T      | frameshift_variant HIGH | Olfr896-ps1   | ENSMUSG1 Transcript | ENSMUSprotein_coding |
| rs2549497:9:382923:-      | frameshift_variant HIGH | Olfr896-ps1   | ENSMUSG1 Transcript | ENSMUSprotein_coding |
| rs2549497:9:382923:-      | frameshift_variant HIGH | Olfr896-ps1   | ENSMUSG1 Transcript | ENSMUSprotein_coding |
| rs2561787:9:411614:-      | frameshift_variant HIGH | Ubash3b       | ENSMUSG1 Transcript | ENSMUSprotein_coding |
| rs2502157:9:483967:AAAA   | frameshift_variant HIGH | Nxpe4         | ENSMUSG1 Transcript | ENSMUSprotein_coding |
| rs2502157:9:483967:AAAAA  | frameshift_variant HIGH | Nxpe4         | ENSMUSG1 Transcript | ENSMUSprotein_coding |
| rs2602437:9:572422(-      | frameshift_variant HIGH | Treg1         | ENSMUSG1 Transcript | ENSMUSprotein_coding |
| rs2640437:9:654846:-      | frameshift_variant HIGH | Spg21         | ENSMUSG1 Transcript | ENSMUSprotein_coding |
| rs2208667:9:660446:AA     | frameshift_variant HIGH | Csnk1g1       | ENSMUSG1 Transcript | ENSMUSprotein_coding |
| rs2208667:9:660446:AA     | frameshift_variant HIGH | Csnk1g1       | ENSMUSG1 Transcript | ENSMUSprotein_coding |
| rs2653577:9:711624:-      | frameshift_variant HIGH | Aqp9          | ENSMUSG1 Transcript | ENSMUSprotein_coding |
| rs2654227:9:108797:-      | frameshift_variant HIGH | Ip6k2         | ENSMUSG1 Transcript | ENSMUSprotein_coding |
| rs2570117:X:136533:A      | frameshift_variant HIGH | Kir3dl1       | ENSMUSG1 Transcript | ENSMUSprotein_coding |
| rs2570117:X:136533:A      | frameshift_variant HIGH | Kir3dl1       | ENSMUSG1 Transcript | ENSMUSprotein_coding |
| rs2170017:11:10310:GACTG  | frameshift_variant HIGH | Acbd4         | ENSMUSG1 Transcript | ENSMUSprotein_coding |
| rs2546767:12:10370:AGTG   | frameshift_variant HIGH | Nt5c1b        | ENSMUSG1 Transcript | ENSMUSprotein_coding |
| rs2546767:12:10370:AGTG   | frameshift_variant HIGH | Nt5c1b        | ENSMUSG1 Transcript | ENSMUSprotein_coding |
| rs2546767:12:10370:AGTG   | frameshift_variant HIGH | Nt5c1b        | ENSMUSG1 Transcript | ENSMUSprotein_coding |
| rs2546767:12:10370:AGTG   | frameshift_variant HIGH | Nt5c1b        | ENSMUSG1 Transcript | ENSMUSprotein_coding |
| rs2546767:12:10370:AGTG   | frameshift_variant HIGH | Nt5c1b        | ENSMUSG1 Transcript | ENSMUSprotein_coding |
| rs2546767:12:10370:AGTG   | frameshift_variant HIGH | Nt5c1b        | ENSMUSG1 Transcript | ENSMUSprotein_coding |
| rs2546767:12:10370:AGTG   | frameshift_variant HIGH | Nt5c1b        | ENSMUSG1 Transcript | ENSMUSprotein_coding |
| rs2190637:12:24044(-      | frameshift_variant HIGH | 9030624G23Rik | ENSMUSG1 Transcript | ENSMUSprotein_coding |
| rs3878367:16:32754:A      | frameshift_variant HIGH | Muc4          | ENSMUSG1 Transcript | ENSMUSprotein_coding |
| rs2192707:17:36164:TT     | frameshift_variant HIGH | Gm8909        | ENSMUSG1 Transcript | ENSMUSprotein_coding |
| rs2192707:17:36164:TT     | frameshift_variant HIGH | Gm8909        | ENSMUSG1 Transcript | ENSMUSprotein_coding |
| rs2312707:2:909177(A      | frameshift_variant HIGH | Ptpmt1        | ENSMUSG1 Transcript | ENSMUSprotein_coding |
| rs3877917:2:121518:-      | frameshift_variant HIGH | Wdr76         | ENSMUSG1 Transcript | ENSMUSprotein_coding |
| rs2471187:3:135318:GT     | frameshift_variant HIGH | Slc9b2        | ENSMUSG1 Transcript | ENSMUSprotein_coding |
| rs2560927:6:137842:TGGGCA | frameshift_variant HIGH | Dera          | ENSMUSG1 Transcript | ENSMUSprotein_coding |
| rs2579607:5:923631:G      | frameshift_variant HIGH | Cxcl11        | ENSMUSG1 Transcript | ENSMUSprotein_coding |
| rs2140907:11:55218:-      | frameshift_variant HIGH | Xbp1          | ENSMUSG1 Transcript | ENSMUSprotein_coding |
| rs2209617:7:103682:-      | frameshift_variant HIGH | Olfr625-ps1   | ENSMUSG1 Transcript | ENSMUSprotein_coding |
| rs2606317:1:150993(T      | frameshift_variant HIGH | Hmcn1         | ENSMUSG1 Transcript | ENSMUSprotein_coding |
| rs2606317:1:150993(T      | frameshift_variant HIGH | Hmcn1         | ENSMUSG1 Transcript | ENSMUSprotein_coding |
| rs2539787:10:12817(T      | frameshift_variant HIGH | Rbms2         | ENSMUSG1 Transcript | ENSMUSprotein_coding |

|                        |                           |          |                    |                      |
|------------------------|---------------------------|----------|--------------------|----------------------|
| rs239353:3:417420:-    | frameshift_variant HIGH   | Selt1    | ENSMUSG Transcript | ENSMUSprotein_coding |
| rs218008:6:146576:T    | frameshift_variant HIGH   | Ints13   | ENSMUSG Transcript | ENSMUSprotein_coding |
| rs216588:7:858759:-    | frameshift_variant HIGH   | Vmn2r73  | ENSMUSG Transcript | ENSMUSprotein_coding |
| rs216588:7:858759:-    | frameshift_variant HIGH   | Vmn2r73  | ENSMUSG Transcript | ENSMUSprotein_coding |
| rs216588:7:858759:-    | frameshift_variant HIGH   | Vmn2r73  | ENSMUSG Transcript | ENSMUSprotein_coding |
| rs216588:7:858759:-    | frameshift_variant HIGH   | Vmn2r73  | ENSMUSG Transcript | ENSMUSprotein_coding |
| rs216588:7:858759:-    | frameshift_variant HIGH   | Vmn2r73  | ENSMUSG Transcript | ENSMUSprotein_coding |
| rs216588:7:858759:-    | frameshift_variant HIGH   | Vmn2r73  | ENSMUSG Transcript | ENSMUSprotein_coding |
| rs216588:7:858759:-    | frameshift_variant HIGH   | Vmn2r73  | ENSMUSG Transcript | ENSMUSprotein_coding |
| rs216588:7:858759:-    | frameshift_variant HIGH   | Vmn2r73  | ENSMUSG Transcript | ENSMUSprotein_coding |
| rs234740:1:175688:-    | frameshift_variant HIGH   | Chml     | ENSMUSG Transcript | ENSMUSprotein_coding |
| rs212845:2:121128:-    | frameshift_variant HIGH   | Lcmt2    | ENSMUSG Transcript | ENSMUSprotein_coding |
| rs250705:1:192343:A    | frameshift_variant HIGH   | Tfap2b   | ENSMUSG Transcript | ENSMUSprotein_coding |
| rs250705:1:192343:AA   | frameshift_variant HIGH   | Tfap2b   | ENSMUSG Transcript | ENSMUSprotein_coding |
| rs250705:1:192343:A    | frameshift_variant HIGH   | Tfap2b   | ENSMUSG Transcript | ENSMUSprotein_coding |
| rs250705:1:192343:AA   | frameshift_variant HIGH   | Tfap2b   | ENSMUSG Transcript | ENSMUSprotein_coding |
| rs254981:2:119964:TGAG | frameshift_variant HIGH   | Mga      | ENSMUSG Transcript | ENSMUSprotein_coding |
| rs254981:2:119964:TGAG | frameshift_variant HIGH   | Mga      | ENSMUSG Transcript | ENSMUSprotein_coding |
| rs254981:2:119964:TGAG | frameshift_variant HIGH   | Mga      | ENSMUSG Transcript | ENSMUSprotein_coding |
| rs254981:2:119964:TGAG | frameshift_variant HIGH   | Mga      | ENSMUSG Transcript | ENSMUSprotein_coding |
| rs236730:8:107061:TAGC | frameshift_variant HIGH   | Tmed6    | ENSMUSG Transcript | ENSMUSprotein_coding |
| rs243387:10:10579:T    | splice_acceptor HIGH      | Mettl25  | ENSMUSG Transcript | ENSMUSprotein_coding |
| rs227036:12:24668:-    | splice_acceptor HIGH      | Cys1     | ENSMUSG Transcript | ENSMUSprotein_coding |
| rs236447:14:52296:TG   | splice_acceptor HIGH      | Mettl3   | ENSMUSG Transcript | ENSMUSprotein_coding |
| rs228816:15:96587 TT   | splice_acceptor HIGH      | Slc38a1  | ENSMUSG Transcript | ENSMUSprotein_coding |
| rs228816:15:96587 TT   | splice_acceptor HIGH      | Slc38a1  | ENSMUSG Transcript | ENSMUSprotein_coding |
| rs228816:15:96587 TT   | splice_acceptor HIGH      | Slc38a1  | ENSMUSG Transcript | ENSMUSprotein_coding |
| rs251670:2:122296 TGCA | splice_acceptor HIGH      | Duox2    | ENSMUSG Transcript | ENSMUSprotein_coding |
| rs251670:2:122296 TGCA | splice_acceptor HIGH      | Duox2    | ENSMUSG Transcript | ENSMUSprotein_coding |
| rs219251:2:157101:-    | splice_acceptor HIGH      | Samhd1   | ENSMUSG Transcript | ENSMUSprotein_coding |
| rs219251:2:157101:-    | splice_acceptor HIGH      | Samhd1   | ENSMUSG Transcript | ENSMUSprotein_coding |
| rs219251:2:157101:-    | splice_acceptor HIGH      | Samhd1   | ENSMUSG Transcript | ENSMUSprotein_coding |
| rs216360:4:112072:-    | splice_acceptor HIGH      | Skint4   | ENSMUSG Transcript | ENSMUSprotein_coding |
| rs243253:11:12105:-    | splice_acceptor HIGH      | Sectm1b  | ENSMUSG Transcript | ENSMUSprotein_coding |
| rs245068:7:193685:-    | splice_acceptor HIGH      | Ppp1r13l | ENSMUSG Transcript | ENSMUSprotein_coding |
| rs223913:5:383002:-    | splice_acceptor HIGH      | Otop1    | ENSMUSG Transcript | ENSMUSprotein_coding |
| rs246861:13:22855:-    | splice_acceptor HIGH      | Vmn1r211 | ENSMUSG Transcript | ENSMUSprotein_coding |
| rs249041:10:14760:TAAA | splice_donor_variant HIGH | Nmbr     | ENSMUSG Transcript | ENSMUSprotein_coding |
| rs249041:10:14760:TAAA | splice_donor_variant HIGH | Nmbr     | ENSMUSG Transcript | ENSMUSprotein_coding |
| rs259454:10:12700:TA   | splice_donor_variant HIGH | Avil     | ENSMUSG Transcript | ENSMUSprotein_coding |
| rs225570:13:23807:T    | splice_donor_variant HIGH | Slc17a2  | ENSMUSG Transcript | ENSMUSprotein_coding |
| rs227181:2:177074:-    | splice_donor_variant HIGH | Gm14401  | ENSMUSG Transcript | ENSMUSprotein_coding |
| rs248430:6:136599:TAAA | splice_donor_variant HIGH | Atf7ip   | ENSMUSG Transcript | ENSMUSprotein_coding |
| rs226789:7:122983:TA   | splice_donor_variant HIGH | Rbbp6    | ENSMUSG Transcript | ENSMUSprotein_coding |
| rs226789:7:122983:TA   | splice_donor_variant HIGH | Rbbp6    | ENSMUSG Transcript | ENSMUSprotein_coding |
| rs226789:7:122983:TA   | splice_donor_variant HIGH | Rbbp6    | ENSMUSG Transcript | ENSMUSprotein_coding |
| rs234841:10:77132:-    | splice_donor_variant HIGH | Lats1    | ENSMUSG Transcript | ENSMUSprotein_coding |
| rs252335:15:79741:-    | splice_donor_variant HIGH | Sun2     | ENSMUSG Transcript | ENSMUSprotein_coding |
| rs233926:7:195083:-    | splice_donor_variant HIGH | Bloc1s3  | ENSMUSG Transcript | ENSMUSprotein_coding |
| rs241156:7:300720:-    | splice_donor_variant HIGH | Zfp82    | ENSMUSG Transcript | ENSMUSprotein_coding |
| rs241156:7:300720:-    | splice_donor_variant HIGH | Zfp82    | ENSMUSG Transcript | ENSMUSprotein_coding |
| rs241156:7:300720:-    | splice_donor_variant HIGH | Zfp82    | ENSMUSG Transcript | ENSMUSprotein_coding |
| rs241156:7:300720:-    | splice_donor_variant HIGH | Zfp82    | ENSMUSG Transcript | ENSMUSprotein_coding |
| rs241156:7:300720:-    | splice_donor_variant HIGH | Zfp82    | ENSMUSG Transcript | ENSMUSprotein_coding |
| rs241156:7:300720:-    | splice_donor_variant HIGH | Zfp82    | ENSMUSG Transcript | ENSMUSprotein_coding |
| rs254207:1:580591:-    | splice_donor_variant HIGH | Aox1     | ENSMUSG Transcript | ENSMUSprotein_coding |
| rs226993:7:198576:-    | splice_donor_variant HIGH | Gm19345  | ENSMUSG Transcript | ENSMUSprotein_coding |
| rs218993:8:114140:-    | splice_donor_variant HIGH | Col4a2   | ENSMUSG Transcript | ENSMUSprotein_coding |
| rs232569:5:309541:-    | splice_donor_variant HIGH | Abhd1    | ENSMUSG Transcript | ENSMUSprotein_coding |
| rs226722:6:522606:CG   | splice_donor_variant HIGH | Hoxa13   | ENSMUSG Transcript | ENSMUSprotein_coding |
| rs256632:11:11844:-    | splice_donor_variant HIGH | C1qtnf1  | ENSMUSG Transcript | ENSMUSprotein_coding |
| rs260345:11:11944:-    | splice_donor_variant HIGH | Rnf213   | ENSMUSG Transcript | ENSMUSprotein_coding |
| rs260345:11:11944:-    | splice_donor_variant HIGH | Rnf213   | ENSMUSG Transcript | ENSMUSprotein_coding |
| rs256147:12:76031:-    | splice_donor_variant HIGH | Syne2    | ENSMUSG Transcript | ENSMUSprotein_coding |
| rs256147:12:76031:-    | splice_donor_variant HIGH | Syne2    | ENSMUSG Transcript | ENSMUSprotein_coding |

|                           |                             |          |                      |                      |
|---------------------------|-----------------------------|----------|----------------------|----------------------|
| rs2456611:15:86299:-      | splice_donor_variant HIGH   | Tbc1d22a | ENSMUSG01:Transcript | ENSMUSprotein_coding |
| rs2517701:2:618063:-      | splice_donor_variant HIGH   | Tbr1     | ENSMUSG01:Transcript | ENSMUSprotein_coding |
| rs22793816:135198:-       | splice_donor_variant HIGH   | Fam234b  | ENSMUSG01:Transcript | ENSMUSprotein_coding |
| rs2492611:17:25125:AGGC   | stop_gained,frameshift HIGH | Ptx4     | ENSMUSG01:Transcript | ENSMUSprotein_coding |
| rs2492611:17:25125:AGGC   | stop_gained,frameshift HIGH | Ptx4     | ENSMUSG01:Transcript | ENSMUSprotein_coding |
| rs22143718:930681:TTAG    | stop_gained,frameshift HIGH | Ces1b    | ENSMUSG01:Transcript | ENSMUSprotein_coding |
| rs2410011:1:132229:CTCCTA | stop_gained,frameshift HIGH | Gm10188  | ENSMUSG01:Transcript | ENSMUSprotein_coding |
| rs23446313:76062:-        | stop_lost,3_prime HIGH      | Arsk     | ENSMUSG01:Transcript | ENSMUSprotein_coding |
| rs23446313:76062:-        | stop_lost,3_prime HIGH      | Arsk     | ENSMUSG01:Transcript | ENSMUSprotein_coding |
| rs22014014:834419:-       | stop_lost,3_prime HIGH      | Snapc3   | ENSMUSG01:Transcript | ENSMUSprotein_coding |

**Supplement Table S4a.** The list of SZH related genes

| <b>GeneSymbol</b> | <b>Up/down</b> |
|-------------------|----------------|
| Abca1             | up             |
| Acox1             | up             |
| Aldh1l1           | up             |
| Anp32b            | up             |
| Aqp1              | up             |
| Atp1a2            | up             |
| Bag3              | up             |
| Bbx               | up             |
| Btg1              | up             |
| Cadm1             | up             |
| Clu               | up             |
| Crybg3            | up             |
| Ctbp2             | up             |
| Ddit4             | up             |
| Dhrs3             | up             |
| Dynlt1b           | up             |
| Echdc2            | up             |
| Edn1              | up             |
| Efemp1            | up             |
| Fam107a           | up             |
| Fermt2            | up             |
| Fyn               | up             |
| Gja1              | up             |
| Gmnn              | up             |
| Gmpr              | up             |
| Gng12             | up             |
| Gramd1c           | up             |
| Hmgb2             | up             |
| Hspb1             | up             |
| Id4               | up             |
| Ifitm1            | up             |
| Ifitm1            | up             |
| Iqgap1            | up             |
| Itgb4             | up             |
| Lgals3            | up             |
| Lpl               | up             |
| Mapre1            | up             |
| Med13l            | up             |
| Mt1               | up             |
| Nacc2             | up             |
| Necap2            | up             |
| Nipbl             | up             |
| Npas3             | up             |

|           |      |
|-----------|------|
| Nrxn3     | up   |
| Ntrk2     | up   |
| Oxtr      | up   |
| P4ha1     | up   |
| Palld     | up   |
| Pard3     | up   |
| Pdlim5    | up   |
| Plin2     | up   |
| Plin3     | up   |
| Plod2     | up   |
| Pon2      | up   |
| Ralgds    | up   |
| Rhobtb3   | up   |
| Ryr3      | up   |
| Scrg1     | up   |
| Selenbp1  | up   |
| Serpina3a | up   |
| Smtn      | up   |
| Sox9      | up   |
| Tgif1     | up   |
| Tiparp    | up   |
| Tmem176a  | up   |
| Tnfrsf23  | up   |
| Tob2      | up   |
| Tra2a     | up   |
| Tulp3     | up   |
| Wfs1      | up   |
| Wnk1      | up   |
| Zhx2      | up   |
| Cd99      | up   |
| Notch2    | up   |
| Il17Rb    | up   |
| Txnip     | up   |
| Baz2B     | up   |
| Dcxr      | up   |
| Pbxip1    | up   |
| Acat3     | down |
| Arl4c     | down |
| Atp1b3    | down |
| Atp6v1a   | down |
| Atp6v1d   | down |
| Atp8a2    | down |
| Atrnl1    | down |
| Bbs7      | down |
| Bcl6      | down |
| Blvra     | down |

|          |      |
|----------|------|
| Cacnb1   | down |
| Clcn4    | down |
| Crhbp    | down |
| Cyp26b1  | down |
| Diras2   | down |
| Dlgap1   | down |
| Dync1li1 | down |
| Edn3     | down |
| Egr1     | down |
| Ensa     | down |
| Ets2     | down |
| Etv5     | down |
| Fabp3    | down |
| Fbxo9    | down |
| Fbxw7    | down |
| Fhl2     | down |
| Glce     | down |
| Hbq1b    | down |
| Hint1    | down |
| Idh3a    | down |
| Itm2a    | down |
| Kcnk1    | down |
| Lbh      | down |
| Lgals8   | down |
| Lrrc17   | down |
| Map2k4   | down |
| Mpped2   | down |
| Ndufb6   | down |
| Nell1    | down |
| Nmu      | down |
| Nptx2    | down |
| Npy      | down |
| Nr4a2    | down |
| Olfm1    | down |
| Penk     | down |
| Phtf1    | down |
| Pias2    | down |
| Pnoc     | down |
| Prmt8    | down |
| Prps1    | down |
| Prss16   | down |
| Slc25a12 | down |
| Slc29a1  | down |
| Smyd2    | down |
| Snn      | down |
| Sulf1    | down |

|          |      |
|----------|------|
| Syng3    | down |
| Tac1     | down |
| Tbc1d9   | down |
| Timm17a  | down |
| Tnfrsf10 | down |
| Try10    | down |
| Ube2d2a  | down |
| Vsn11    | down |
| Tpbp     | down |
| Snx10    | down |
| Arpp19   | down |
| Opn3     | down |
| Cdc42    | down |
| Prkacb   | down |
| Reep1    | down |
| Mcts1    | down |
| Pvalb    | down |
| Lrmp     | down |
| Sts      | down |
| Uchl5    | down |
| Moap1    | down |

**Supplement Table S4b.** The list of ASD related genes

| <b>GeneSymbol</b> | <b>Up/down</b> |
|-------------------|----------------|
| Hspb1             | up             |
| Adam12            | up             |
| Slc2a5            | up             |
| Csf3r             | up             |
| Mapkapk2          | up             |
| Palld             | up             |
| Siglece           | up             |
| Colla1            | up             |
| Sell              | up             |
| Foxj1             | up             |
| Apoe              | up             |
| Gypc              | up             |
| Ribc1             | up             |
| C3                | up             |
| Pgghg             | up             |
| Slc9a9            | up             |
| Pik3ap1           | up             |
| Bace2             | up             |
| Glis2             | up             |
| Agtrap            | up             |
| Arid5a            | up             |
| Hck               | up             |
| Ifi205            | up             |
| Phf21b            | up             |
| S100a3            | up             |
| Cebpd             | up             |
| Zfp36             | up             |
| Ngfr              | up             |
| Sla               | up             |
| Bves              | up             |
| Sgk1              | up             |
| Irf7              | up             |
| Plin3             | up             |
| Sectm1a           | up             |
| Tmem176a          | up             |
| Trim56            | up             |
| Il21r             | up             |
| Tlr5              | up             |
| Elf1              | up             |
| Cd93              | up             |
| Itgb2             | up             |
| Bcl6              | up             |
| Alpk1             | up             |

|          |    |
|----------|----|
| Tnfaip3  | up |
| Clic1    | up |
| Pdk4     | up |
| Lilra5   | up |
| Abi3     | up |
| Prrx2    | up |
| Ptger4   | up |
| Wee1     | up |
| Rgs1     | up |
| Gadd45b  | up |
| Tead4    | up |
| Ucp2     | up |
| Ptprc    | up |
| Hmox1    | up |
| Dtx2     | up |
| Batf2    | up |
| Ifit1bl2 | up |
| Spi1     | up |
| Zfp361l  | up |
| Stab1    | up |
| Cfap53   | up |
| Gbp1     | up |
| Oas2     | up |
| Trpv4    | up |
| Thbs1    | up |
| Srgap1   | up |
| Cdk2     | up |
| Gpr84    | up |
| Gipc3    | up |
| Il4ra    | up |
| Tgif1    | up |
| Tm4sf1   | up |
| Vasp     | up |
| Cdkn1a   | up |
| Lcp1     | up |
| Rhpn2    | up |
| Nuak2    | up |
| Fosb     | up |
| Alas2    | up |
| Hamp     | up |
| Tlr2     | up |
| Parp9    | up |
| Hap1     | up |
| Havcr2   | up |
| Gm49342  | up |
| Eya2     | up |

|          |    |
|----------|----|
| Bcl2l12  | up |
| Nfe2     | up |
| C1ra     | up |
| Sox4     | up |
| Msn      | up |
| Dnajb1   | up |
| Plek     | up |
| Fgf11    | up |
| Tgm2     | up |
| Epha2    | up |
| Abhd4    | up |
| Nfatc1   | up |
| Tagln2   | up |
| Ezh2     | up |
| Osmr     | up |
| Abca1    | up |
| Tiparp   | up |
| Dtx3l    | up |
| Dbx2     | up |
| Muc1     | up |
| Gng5     | up |
| C3ar1    | up |
| Efh1     | up |
| Adamts9  | up |
| Cfh      | up |
| C4b      | up |
| Kifc1    | up |
| Nupr1    | up |
| Dsc2     | up |
| Cxcl11   | up |
| Il1rl1   | up |
| Fcgr1    | up |
| Cyp4f18  | up |
| Parp14   | up |
| Ftl1-ps1 | up |
| Eps8l1   | up |
| Gja4     | up |
| Mthfd2   | up |
| Myof     | up |
| Samd9l   | up |
| Helz2    | up |
| Sphk1    | up |
| Prkx     | up |
| Gbp2b    | up |
| Was      | up |
| Lat2     | up |

|         |    |
|---------|----|
| Sh3tc1  | up |
| S100a8  | up |
| Lix1    | up |
| Mcl1    | up |
| Il6     | up |
| Batf    | up |
| Mvp     | up |
| Fgfr1   | up |
| Vdr     | up |
| Cd37    | up |
| Oscar   | up |
| Lats2   | up |
| Gadd45g | up |
| Bst2    | up |
| Sp100   | up |
| Pygl    | up |
| Cfi     | up |
| Cd51    | up |
| Ube2c   | up |
| Gpr4    | up |
| Ntn1    | up |
| Tcirg1  | up |
| Kif1c   | up |
| Lyl1    | up |
| Rhbdf2  | up |
| Rab13   | up |
| Ifi35   | up |
| Fam124b | up |
| Msln    | up |
| Wwtr1   | up |
| Plekha4 | up |
| Kif20a  | up |
| Yap1    | up |
| Spata13 | up |
| Rfx4    | up |
| Pi16    | up |
| Plac8   | up |
| Mfng    | up |
| Gem     | up |
| Pard3   | up |
| Cxcl16  | up |
| Npl     | up |
| Anp32b  | up |
| Itrip   | up |
| Ifi44   | up |
| Hlx     | up |

|            |      |
|------------|------|
| Spocd1     | up   |
| Gm5849     | up   |
| Mmp9       | up   |
| Ctsc       | up   |
| Rit2       | down |
| Nap112     | down |
| Kcnc1      | down |
| Slc6a15    | down |
| Slc6a7     | down |
| Nomo1      | down |
| Slc10a4-ps | down |
| Epha4      | down |
| Apba2      | down |
| Frmpd4     | down |
| Kit        | down |
| Slc17a6    | down |
| Gabrd      | down |
| Ckmt1      | down |
| Sncg       | down |
| Cplx2      | down |
| Kcnv1      | down |
| Rimkla     | down |
| Atp2b3     | down |
| Mllt11     | down |
| Olfm3      | down |
| Rtn4r      | down |
| Fkbpl      | down |
| Sez6l2     | down |
| Cidea      | down |
| Sult4a1    | down |
| Smyd2      | down |
| Syt1       | down |
| Cdh22      | down |
| Glrh       | down |
| Gpat3      | down |
